# Supplementary material for: WNK1 mediates M-CSF-induced macropinocytosis to enforce macrophage lineage fidelity
Source: Springer Nature journal article supplement (doi:10.1038/s41467-025-59901-0), 2025-05-28
Supplement: MOESM1 [file 41467_2025_59901_MOESM1_ESM.pdf]

# **WNK1 mediates M-CSF-induced macropinocytosis to enforce macrophage lineage fidelity**

Alissa J. Trzeciak<sup>^</sup> ... Justin S. A. Perry<sup>^</sup>.

<sup>^</sup>Corresponding authors: [perryj@mskcc.org](mailto:perryj@mskcc.org) and [trzeciaa@mskcc.org](mailto:trzeciaa@mskcc.org).

## **Supplementary Figures 1 – 19**

**a** Fecundity per litter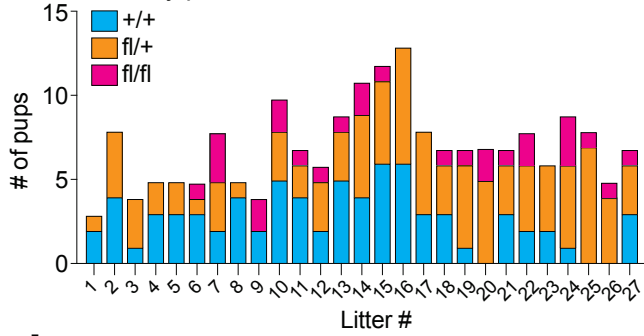**b** Fecundity overall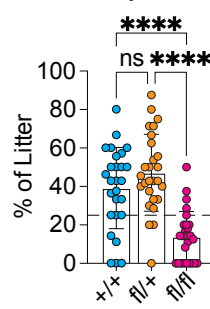**c** Body weight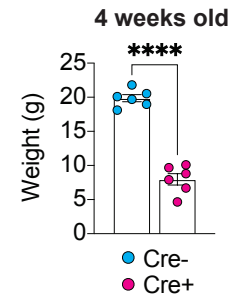**d** Gross organ morphology and size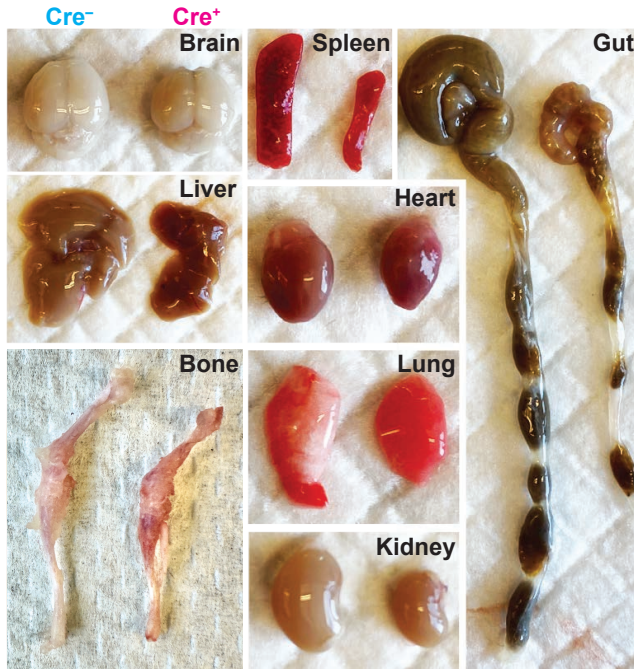**e** Organ Weights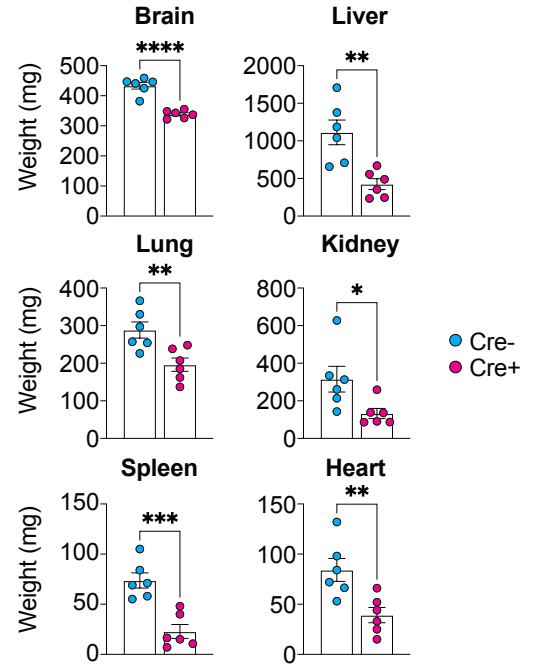**f** Histopathology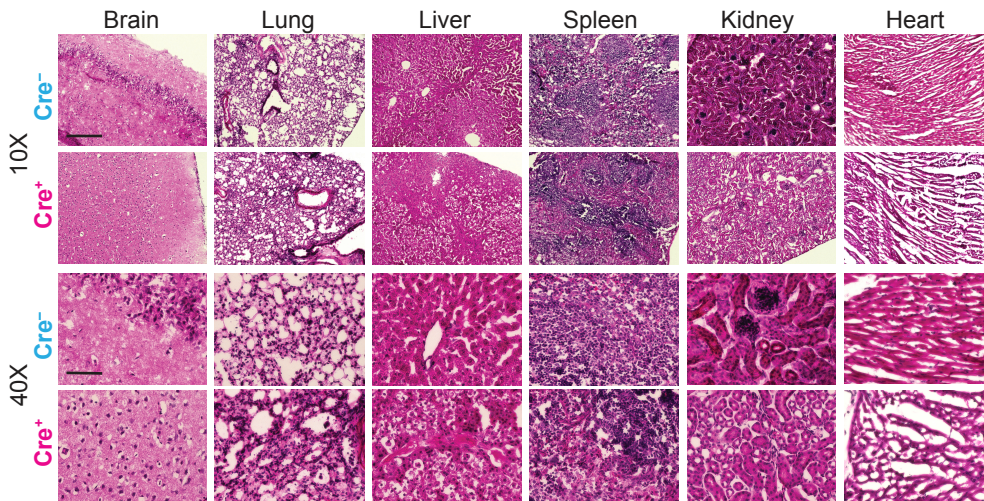**g** Chemistry panel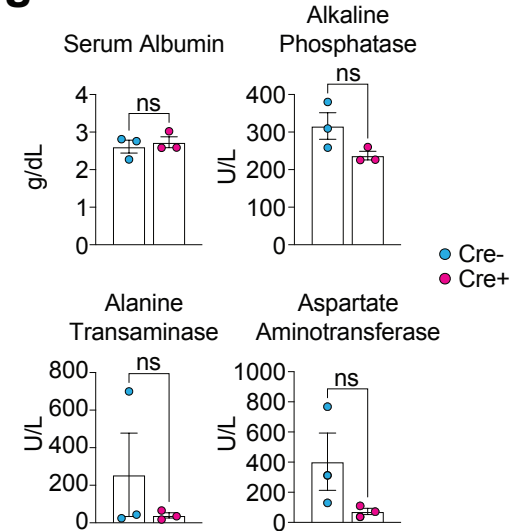**h** Differential cell count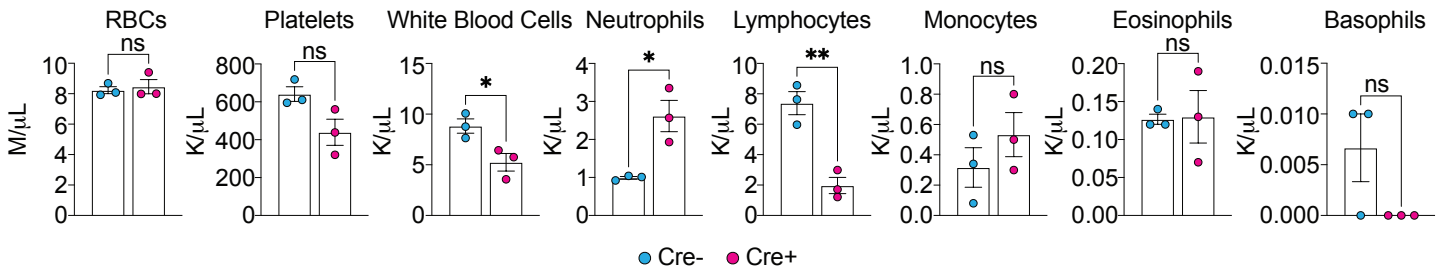



**Supplementary Fig. 1. Tissue-resident macrophages are absent in many organs of *Csf1r<sup>Cre+</sup>; Wnk1<sup>fl/fl</sup>* mice.**

**(a, b)** *Csf1r<sup>Cre+</sup>; Wnk1<sup>fl/fl</sup>* mice do not follow Mendelian inheritance. **(a)** Prevalence of homozygous wildtype (blue), heterozygous (fl/+, orange), and homozygous WNK1-deficient mice (fl/fl, magenta) per litter, and **(b)** percentage of genotype in each litter. n= 27 litters. Data shown as mean  $\pm$  SEM. Statistical significance was determined via one-way ANOVA. \*\*\*\* $p < .0001$ , ns = not significant.

**(c-e)** *Csf1r<sup>Cre+</sup>; Wnk1<sup>fl/fl</sup>* mice are severely runted. Weights **(c)** of *Csf1r<sup>Cre+</sup>; Wnk1<sup>fl/fl</sup>* (Cre+, magenta, n=6) vs. *Csf1r<sup>Cre-</sup>; Wnk1<sup>fl/fl</sup>* (Cre-, blue, n=6) mice before humane sacrifice at 4 weeks of age. Data are representative of three independent experiments. **(d)** Representative images of organs from Cre- and Cre+ mice. Shown are (clockwise from top left) brain, spleen, colon, kidneys, bones, liver, heart, and lungs. Images are representative of organ analysis from six Cre- mice and six Cre+ mice. **(e)** Shown are major organs (clockwise from top left: brain, liver, kidney, heart, spleen, and lung) weights (mg) of Cre+ (magenta, n=6) vs. Cre- (blue, n=6). Data are representative of three independent experiments. Data shown as mean  $\pm$  SEM. Statistical significance was determined via independent samples *t*-test. \* $p < .05$ , \*\* $p < .01$ , \*\*\* $p < .001$ , \*\*\*\* $p < .0001$ .

**(f)** Hematoxylin & eosin (H&E) staining of brain, lung, liver, spleen, kidney, and heart. 10X scale bar, 300 $\mu$ m, 40X scale bar, 50  $\mu$ m. Data are representative of four independent experiments.

**(g)** Serum chemistry parameters of *Csf1r<sup>Cre+</sup>; Wnk1<sup>fl/fl</sup>* (Cre+, magenta, n=3) vs. *Csf1r<sup>Cre-</sup>; Wnk1<sup>fl/fl</sup>* (Cre-, blue, n=3) mice before sacrifice at 4 weeks of age including (clockwise from top left) albumin (g/dL, grams per deciliter), alkaline phosphatase, aspartate aminotransferase, and alanine transaminase (U/L, units per liter) did not constitute trends or correlate with clinical abnormalities. Data shown as mean  $\pm$  SEM. ns = not significant.

**(h)** *Csf1r<sup>Cre+</sup>; Wnk1<sup>fl/fl</sup>* (Cre+, magenta, n=3) vs. *Csf1r<sup>Cre-</sup>; Wnk1<sup>fl/fl</sup>* (Cre-, blue, n=3) mice had decreased total white blood cell counts, decreased lymphocyte numbers, and increased neutrophils before sacrifice at 4 weeks of age. Red blood cell (RBCs, M/ $\mu$ l, millions per cubic microliter), platelet, monocyte, eosinophil, and basophil numbers were not significantly different (K/ $\mu$ l, thousands per cubic microliter). Data shown as mean  $\pm$  SEM. \* $p < .05$ , \*\* $p < .01$ , ns = not significant.

**a** Myeloid cell gating scheme (cells first gated on live singlets)  
(Lung as example)

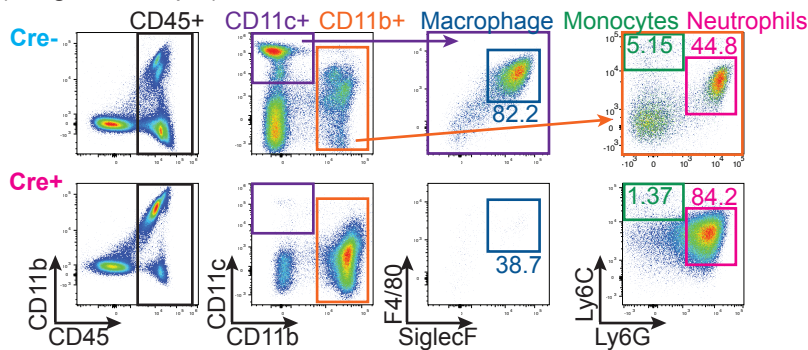

**d** Myeloid cell distribution in lung, liver, spleen, and kidney

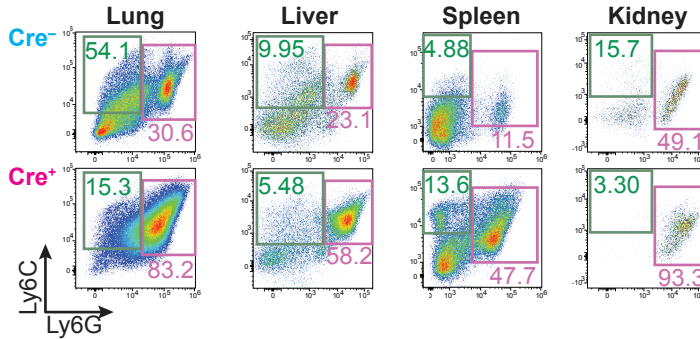

**e** Neutrophil frequency in major organs

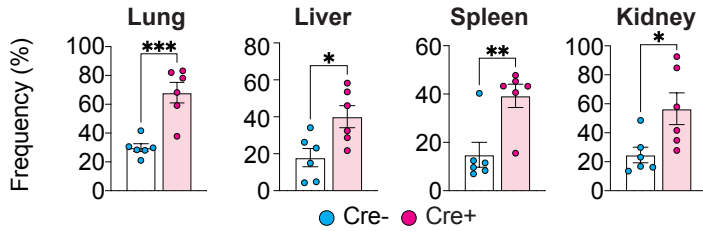

**f** Monocyte quantification in major organs

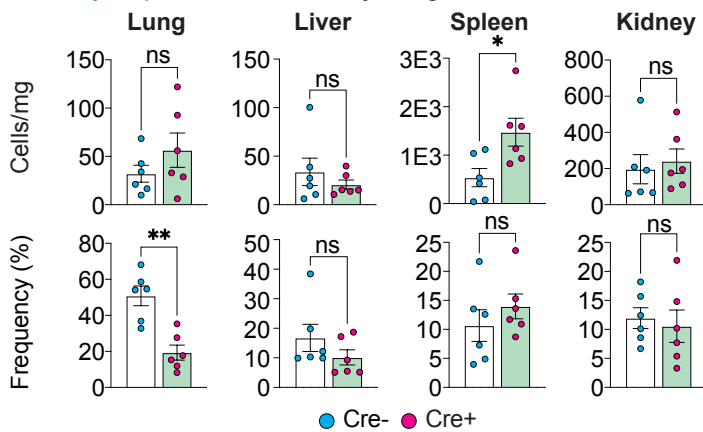

**i** CX<sub>3</sub>CR1<sup>+</sup> monocyte distribution in major organs  
(cells gated on CD11b<sup>+</sup>/Ly6C<sup>-</sup>/Ly6G<sup>-</sup>/SiglecF<sup>-</sup>/F4/80<sup>-</sup>)

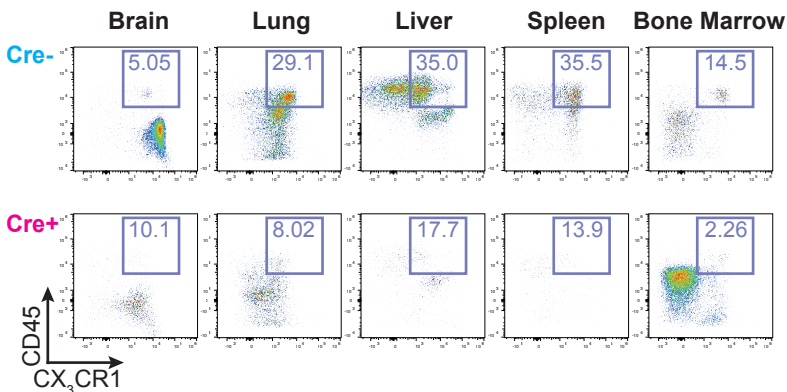

**b** MΦ distribution in brain, heart, and BM

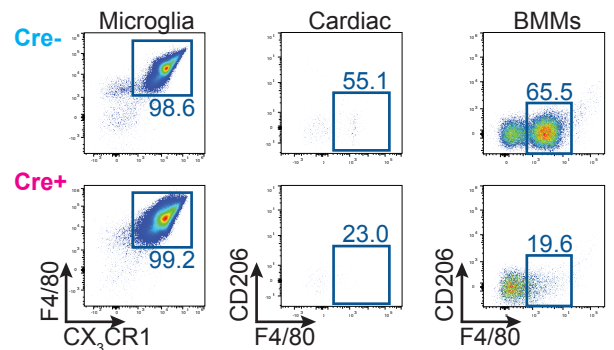

**c** MΦ quantification in brain, heart, and BM

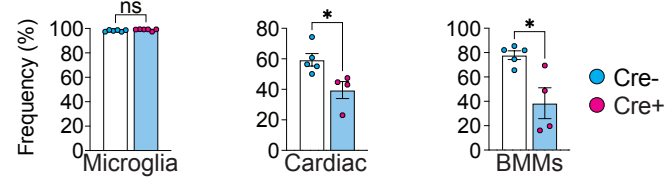

**g** Myeloid cell distribution in brain, blood, heart, and BM

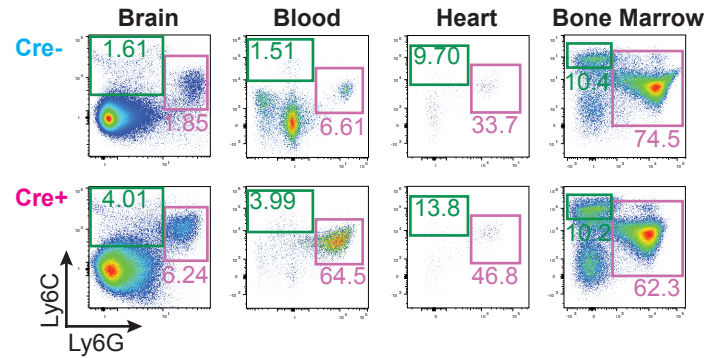

**h** Myeloid cell frequency in brain, blood, heart, and BM

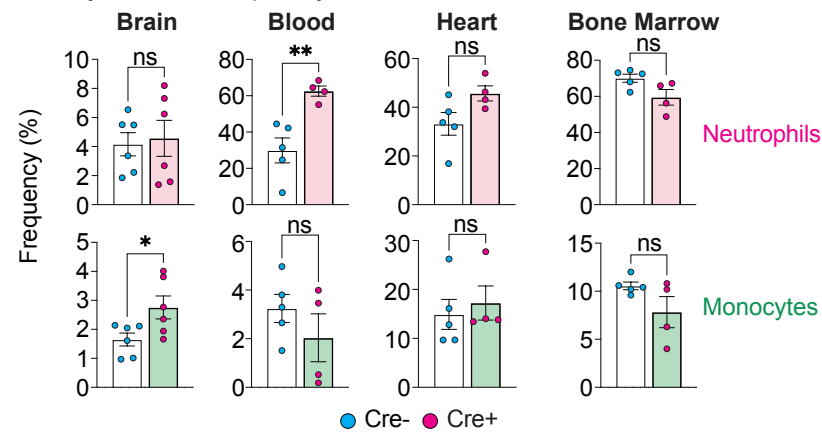

**j** CX<sub>3</sub>CR1<sup>+</sup> monocyte quantification in major organs

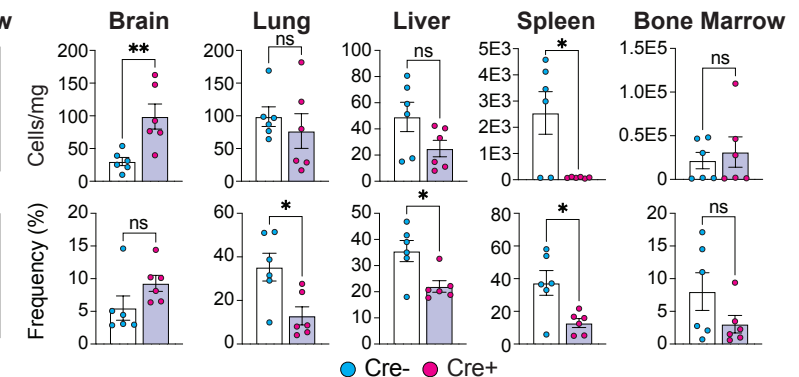

**Supplementary Fig. 2. Analysis of tissue-resident macrophages, neutrophils, and monocytes in *Csf1r*<sup>Cre+</sup>; *Wnk1*<sup>fl/fl</sup> mice.**

**(a)** Example of flow cytometry gating scheme for **Fig. 1c, d** and Supplementary Fig. 2b-h. Shown is gating of cells in the lung.

**(b-h)** Data are from experiments performed in **Fig. 1c, d**. Flow cytometry analyses of tissue-resident macrophages, neutrophils (Ly6G<sup>+</sup>), and monocytes (Ly6C<sup>+</sup>) in essential tissues obtained, analyzed, and presented as in **Fig. 1c, d**. Data are from at least four *Csf1r*<sup>Cre+</sup>; *Wnk1*<sup>fl/fl</sup> mice and five littermate controls. Data shown as mean  $\pm$  SEM. Statistical significance was determined via independent samples *t*-test. \**p* < .05, \*\**p* < .01, \*\*\**p* < .001, ns = not significant.

**(i, j)** Flow cytometry analysis of CX<sub>3</sub>CR1<sup>+</sup> monocytes isolated from experiments performed in **Fig. 1c, d**. Shown are representative flow cytometry plots **(i)** and summary plots of absolute numbers per milligram of tissue and frequencies **(j)** of CX<sub>3</sub>CR1<sup>+</sup> monocytes. Data are from six *Csf1r*<sup>Cre+</sup>; *Wnk1*<sup>fl/fl</sup> mice and six littermate controls. Data shown as mean  $\pm$  SEM. Statistical significance was determined via independent samples *t*-test. \**p* < .05, \*\**p* < .01, ns = not significant.



**a** Immunofluorescence (Lung, Liver, Spleen, and Kidney)

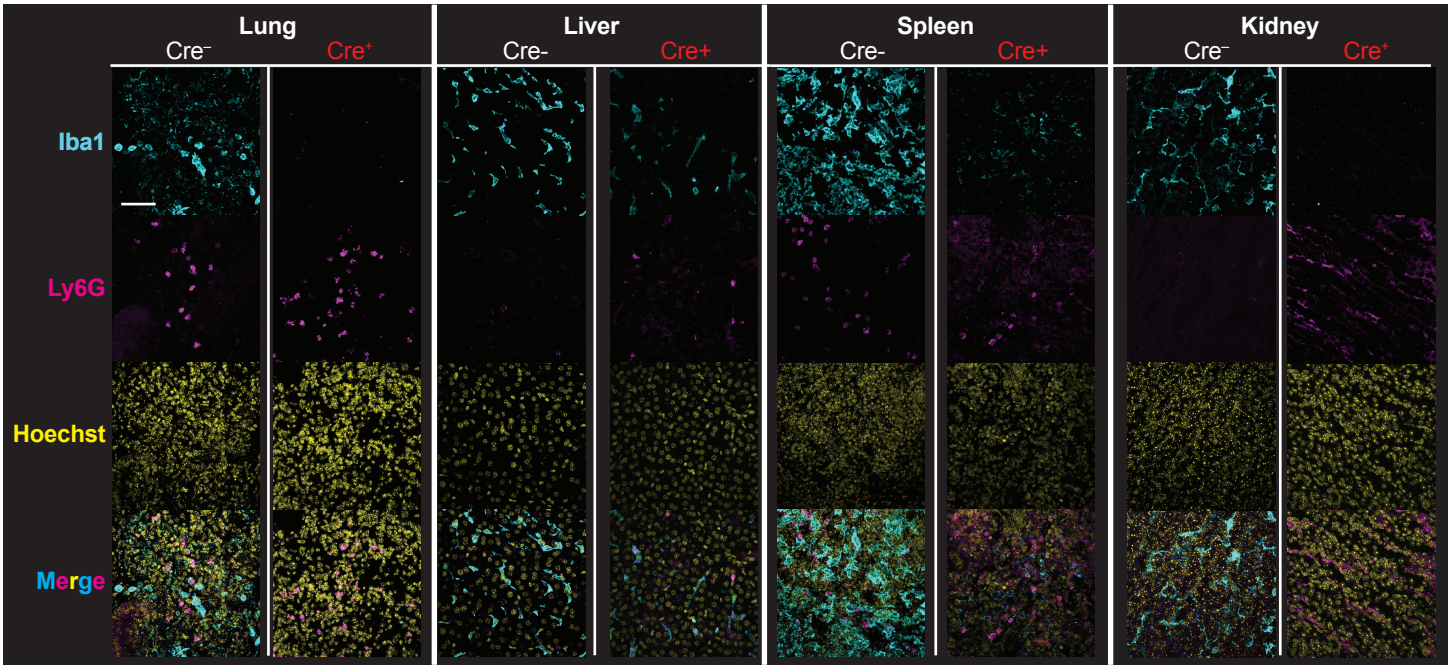

**b** Immunofluorescence (Small Intestine, Brain, and Heart)

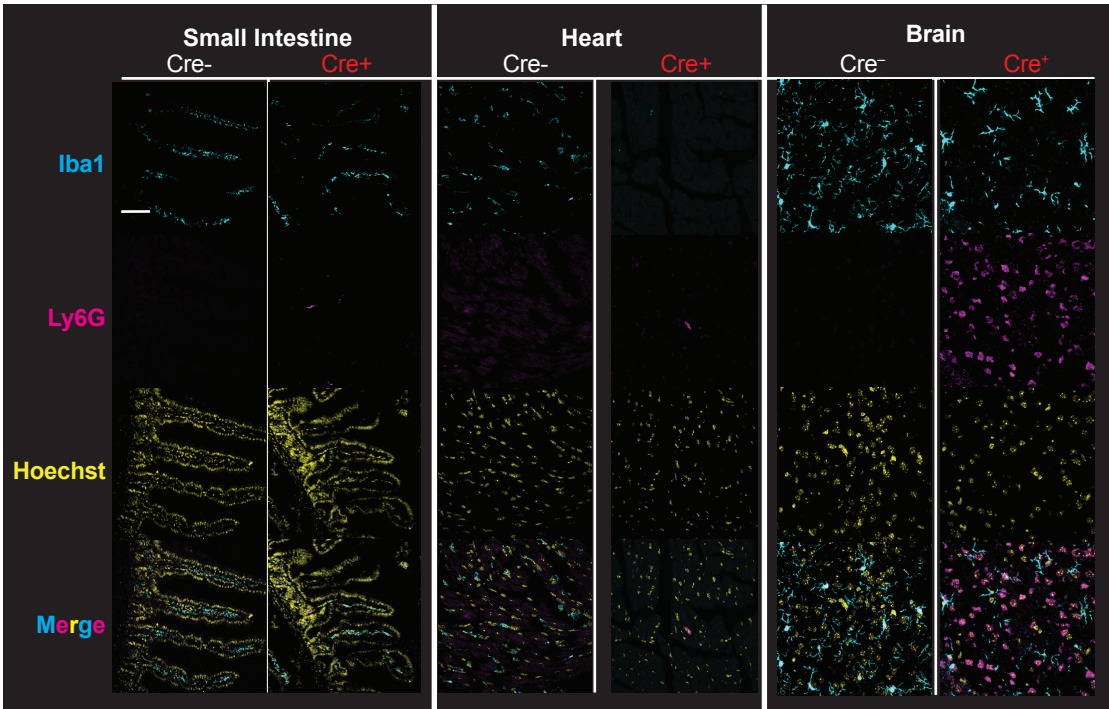

**c** Immunofluorescence (Skin)

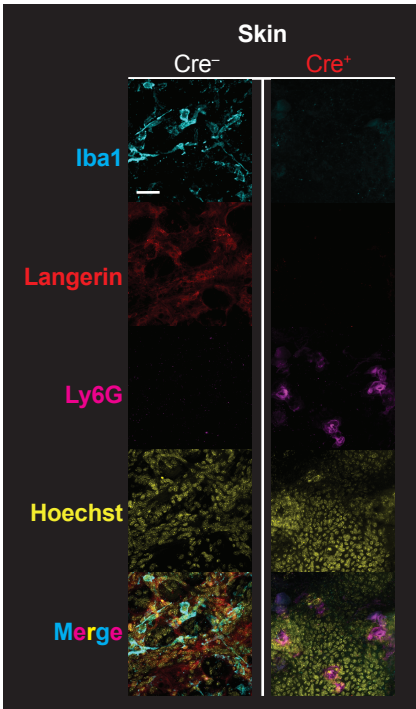

**Supplementary Fig. 3. Immunofluorescence analysis of tissue-resident macrophages and neutrophils in *Csf1r*<sup>Cre+</sup>; *Wnk1*<sup>fl/fl</sup> mice.**

**(a-c)** Immunofluorescence analysis of macrophages and neutrophils in the lung, liver, spleen, and kidney (**a**; corresponding to **Fig. 1c, d**), in the small intestine, heart, and brain (**b**; corresponding to Supplementary Fig. 2b, c), and skin (**c**). Confocal microscopy analysis was performed using Iba1 for macrophages (cyan) and Ly6G for neutrophils (magenta). The skin was stained with an additional marker (Langerin, red) to denote Langerhans cells. Nuclei were labeled using Hoechst (yellow). Scale bar, 20µm. Images are representative of four independent experiments.

**a** Neutrophil Morphology – *in situ*

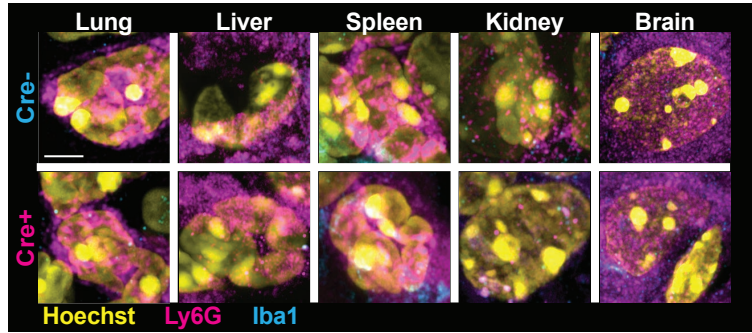

**b** Neutrophil Oxidative Burst

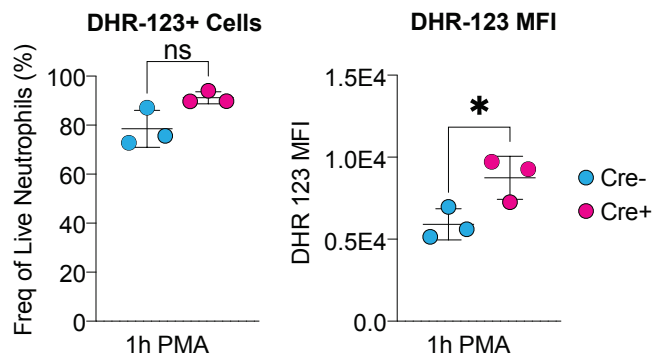

**c** PMN Morphology – *ex vivo*

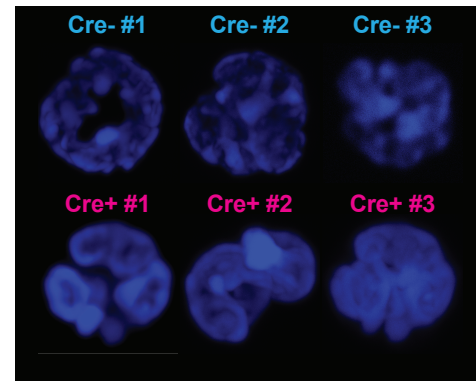



**Supplementary Fig. 4. Function and morphology of neutrophils from *Csflr<sup>Cre+</sup>*; *Wnk1<sup>fl/fl</sup>* mice.**

**(a)** High magnification confocal microscopy analysis was performed of lung, liver, spleen, kidney, and brain neutrophils (Ly6G, magenta) as in **Fig. 1d** and Supplementary Fig. 3. Nuclei were labeled using Hoechst (yellow). Scale bar, 5 $\mu$ m. Images are representative of four independent experiments.

**(b)** Flow cytometric analysis of respiratory burst assay performed on neutrophils purified *ex vivo* from Cre- (n=3, blue dots) and Cre+ (n=3, magenta dots). Frequencies of Dihydrorhodamine-123 (DHR-123) cells (*left*) and MFI (*right*) were analyzed after 1h of phorbol 12-myristate 13-acetate (PMA) stimulation. Data shown as mean  $\pm$  SEM. Statistical significance was determined via independent samples *t*-test. \**p* < .05, ns = not significant.

**(c)** Immunofluorescence analysis of *ex vivo* isolated neutrophil polymorphonuclear (PMN) morphology. Nuclei were labeled with DAPI from n=3 mice per group.

**a** B cell distribution in major organs

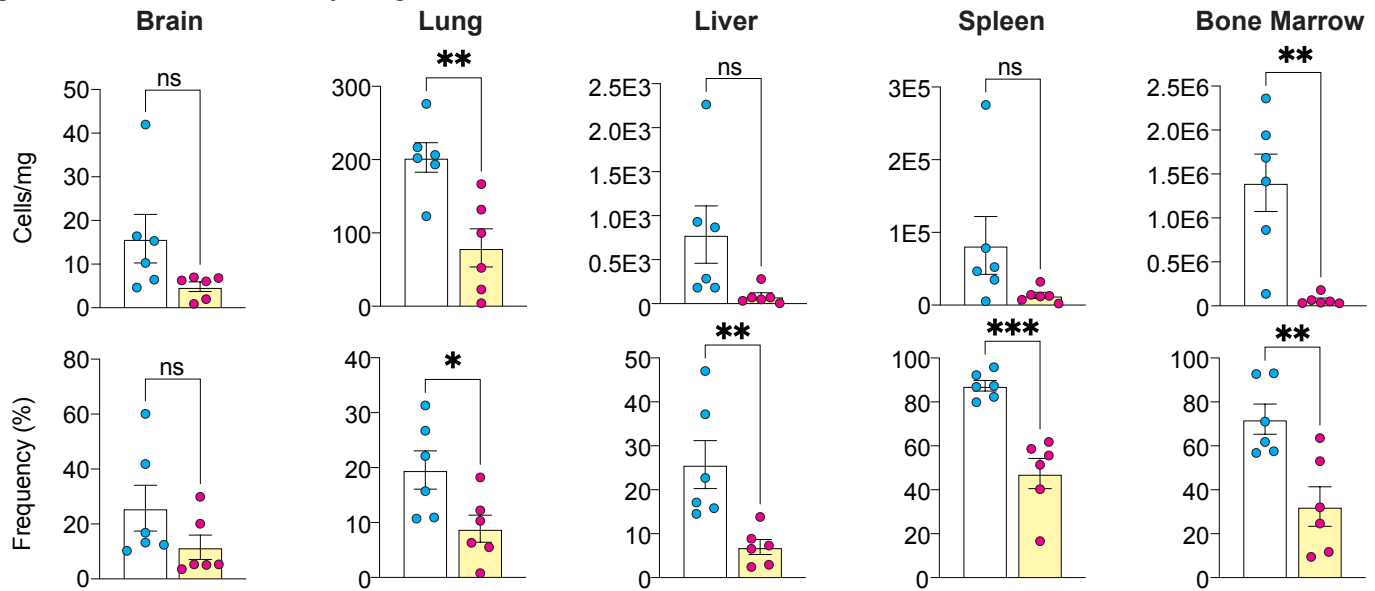

**b** CD4 T cell distribution in major organs

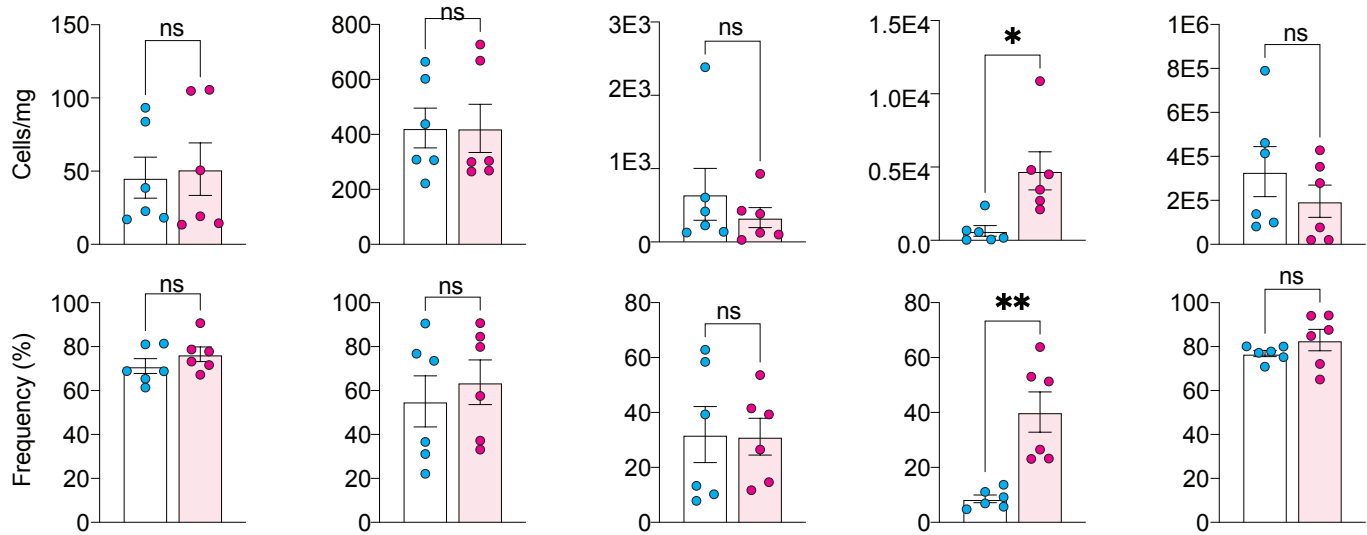

**c** CD8 T cell distribution in major organs

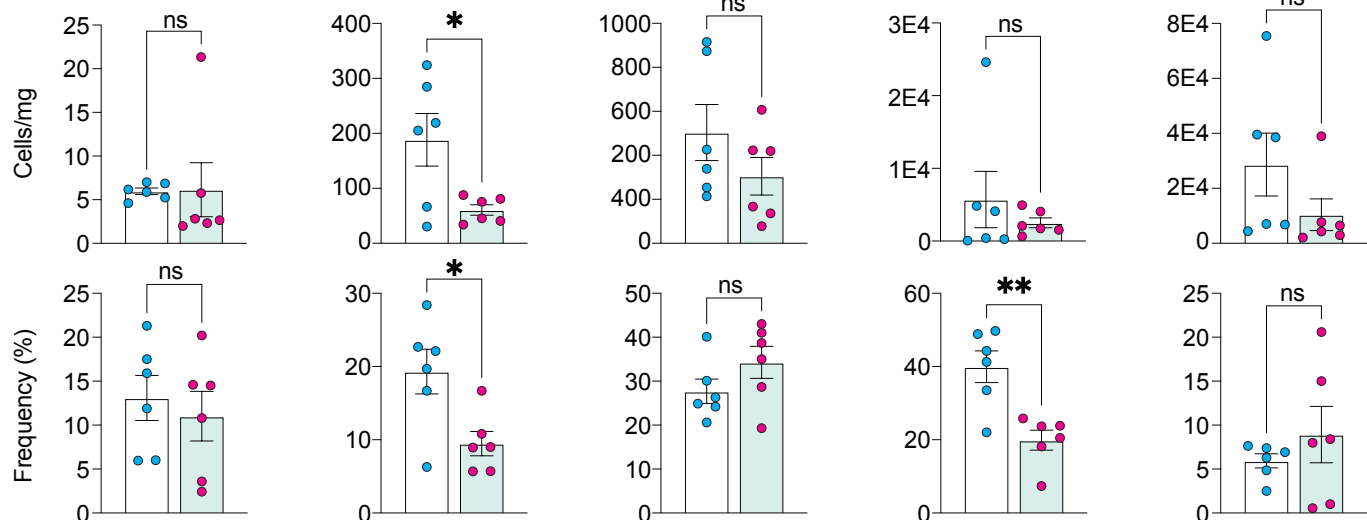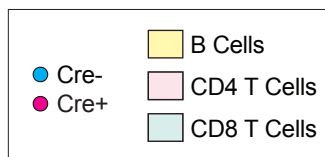

**Supplementary Fig. 5. Lymphoid cell distribution in major organs of *Csf1r<sup>Cre+</sup>*; *Wnk1<sup>fl/fl</sup>* mice.**

**(a-c)** Flow cytometry analysis of the lymphoid compartment isolated from experiments performed in **Fig. 1c, d**. Shown are summary plots of absolute numbers per milligram of tissue (top graphs) and frequencies (bottom graphs) of **(a)** B cells (CD19+ MHCII+ CD4- CD8- CD11b- CD45+), **(b)** CD4+ T cells (CD4+ CD8- CD19- CD11b- CD11c- CD45+), and **(c)** CD8+ T cells (CD8+ CD4- CD19- CD11b- CD11c- CD45+). FACS gating was first performed as shown in Supplementary Fig. 2a. Data are from six *Csf1r<sup>Cre+</sup>*; *Wnk1<sup>fl/fl</sup>* mice and six littermate controls. Data are shown as mean  $\pm$  SEM. Statistical significance was determined via independent samples *t*-test. \* $p < .05$ , \*\* $p < .01$ , \*\*\* $p < .001$ , ns = not significant.



**a** E9.5  $M\Phi$  distribution

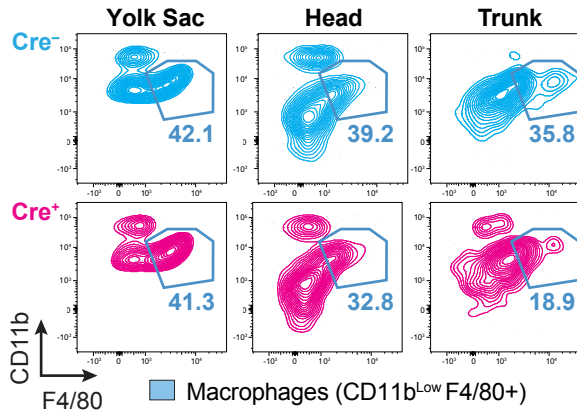

**b** E9.5 EMP distribution

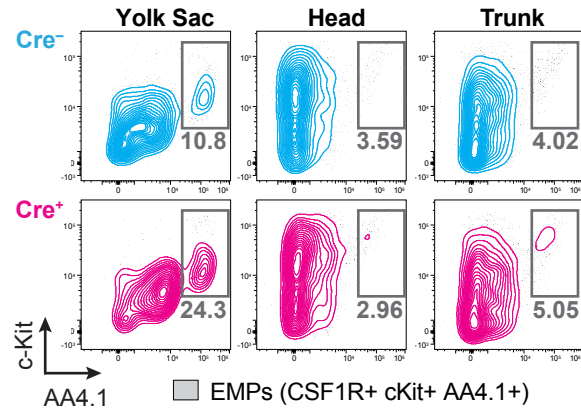

**c** Quantification of E9.5  $M\Phi$

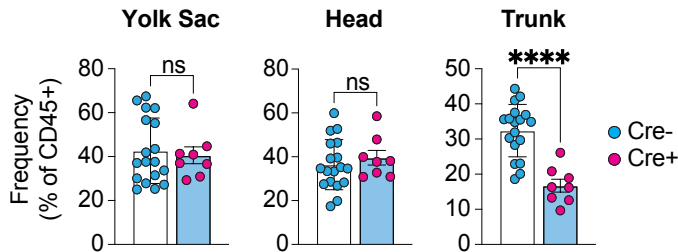

**d** Quantification of E9.5 Neutrophils

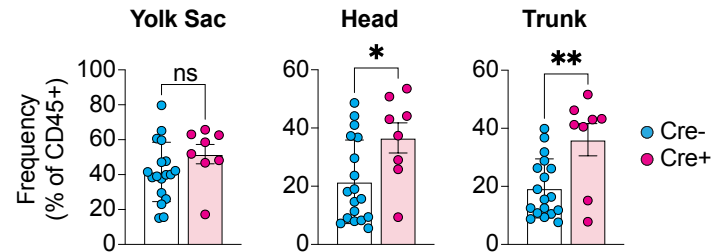

**e** Quantification of E9.5 EMPs

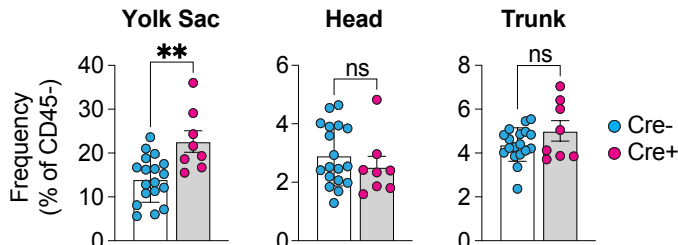

**f** Cell counts of E9.5 EMPs

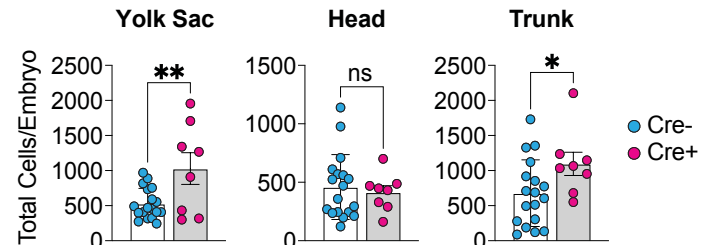

**g** Quantification of E9.5 Fetal Monocytes

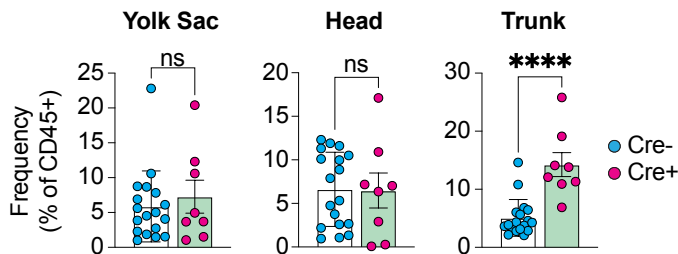

**h** Cell counts of E9.5 Fetal Monocytes

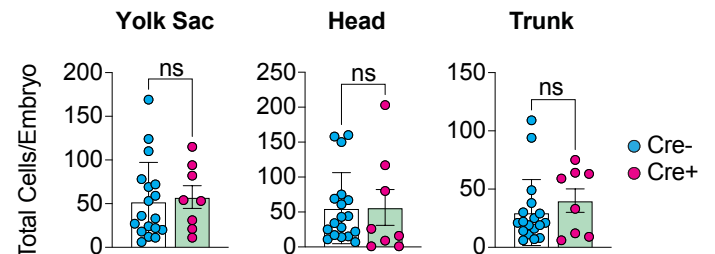

**Supplementary Fig. 6. *Csf1r*<sup>Cre+</sup>; *Wnk1*<sup>fl/fl</sup> E9.5 embryo characterization.**

**(a, b)** Analysis of *Csf1r*<sup>+/+</sup>; *Wnk1*<sup>fl/fl</sup> and *Csf1r*<sup>Cre/+</sup>; *Wnk1*<sup>fl/fl</sup> E9.5 embryos. Representative flow plots of embryonic macrophages (**a**) and erythromyeloid progenitors (EMPs; **b**) in the yolk sac, head, and trunk regions of Cre- embryos and Cre+ embryos at E9.5 of macrophages as CD11b<sup>Low</sup> F4/80+ cells and EMPs as CSF1R+ cKit+ AA4.1+ cells for analysis in **Fig. 1e, f** and Supplementary Fig. 6c-h. Timed pregnancies were performed with *Csf1r*<sup>Cre/+</sup>; *Wnk1*<sup>fl/+</sup> mice bred to *Csf1r*<sup>+/+</sup>; *Wnk1*<sup>fl/fl</sup> mice.

**(c-h)** Flow cytometric analysis of embryonic macrophages, fetal neutrophils, erythromyeloid progenitors (EMPs), and fetal monocytes in E9.5 embryos. 8 pregnant dams were euthanized at E9.5 and embryos were isolated, genotyped, and analyzed. Shown are summary plots of the frequencies (and absolute counts in **f** and **h**) from flow cytometry analysis CD11b<sup>Low</sup> F4/80+ macrophages (**c**), CD11b<sup>High</sup> Ly6C+ Ly6G+ fetal neutrophils (**d**), Lin- CSF1R+ cKit+ AA4.1+ EMPs (**e, f**), and CD11b<sup>High</sup> Ly6C+ fetal monocytes (**g, h**) in Cre- (n=18, blue dots) and Cre+ (n=8, magenta dots) from E9.5 embryos harvested as in **Fig. 1e, f**. FACS gating was first performed as shown in Supplementary Fig. 2a. Pooled data are from 8 independent experiments with between two and six biological replicates per experiment. Data shown as mean ± SEM. Statistical significance was determined via independent samples t-test. \*p < .05, \*\*p < .01, \*\*\*p < .0001, ns = not significant.

**a** E10.5 Embryo sizes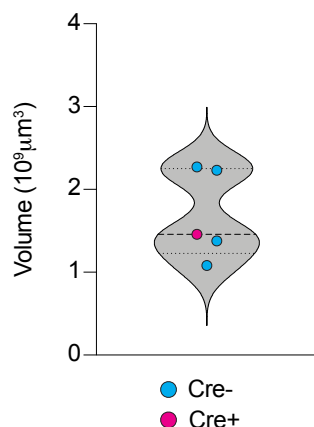**b** Embryonic progenitor and M $\Phi$  *in situ* hybridization (E10.5)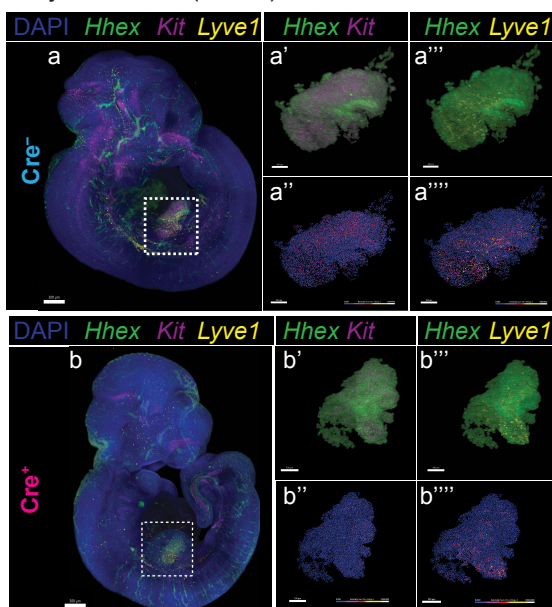**c** E10.5 M $\Phi$  and EMP distribution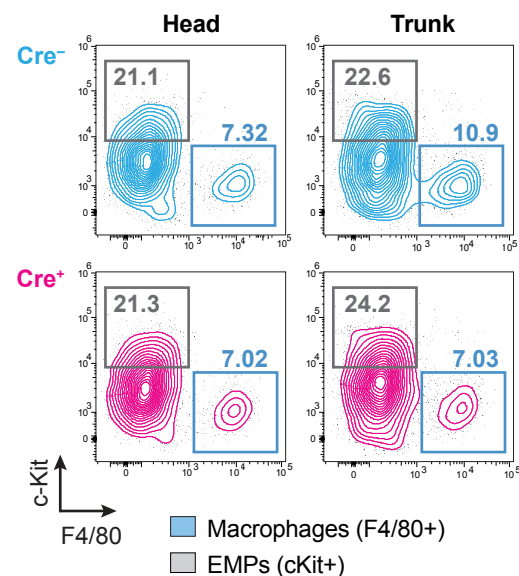**d** Quantification of E10.5 M $\Phi$ 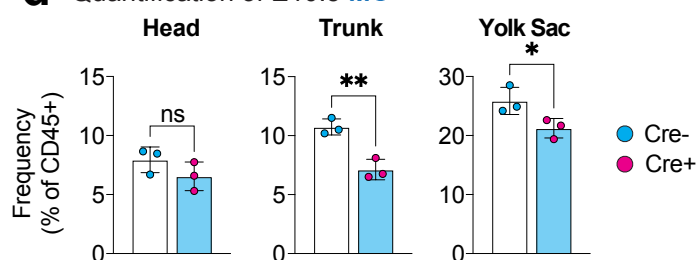**e** Cell counts of E10.5 M $\Phi$ 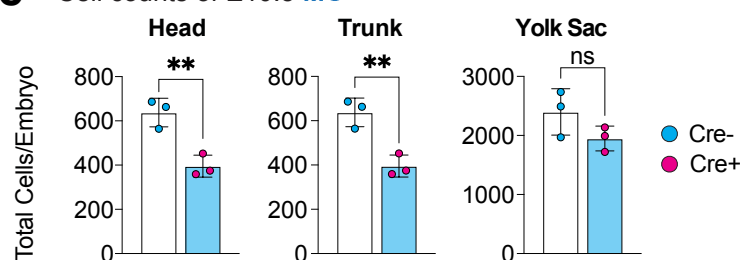**f** Quantification of E10.5 EMPs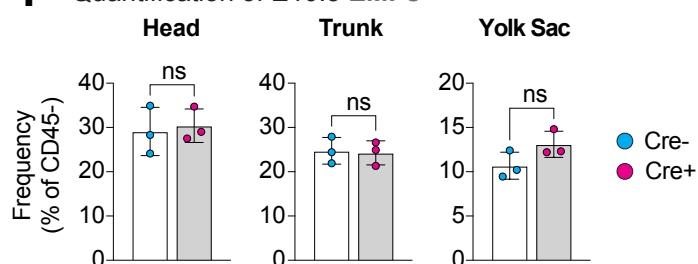**g** Cell counts of E10.5 EMPs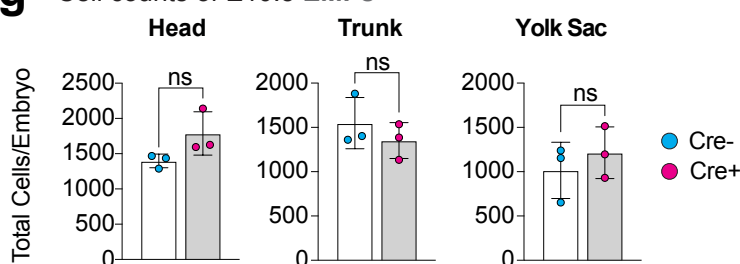**h** Quantification of E11.5 M $\Phi$ 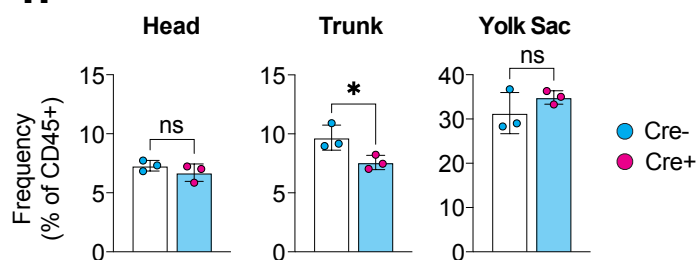**i** Cell counts of E11.5 M $\Phi$ 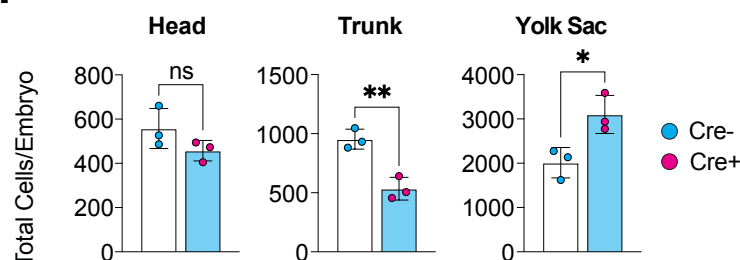**j** Quantification of E11.5 EMPs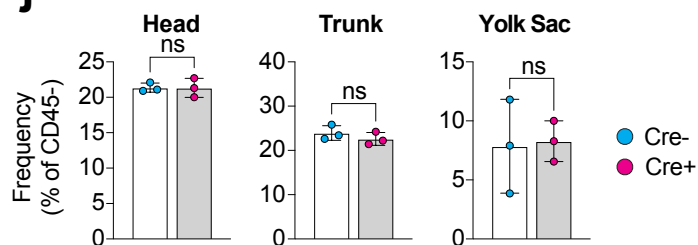**k** Cell counts of E11.5 EMPs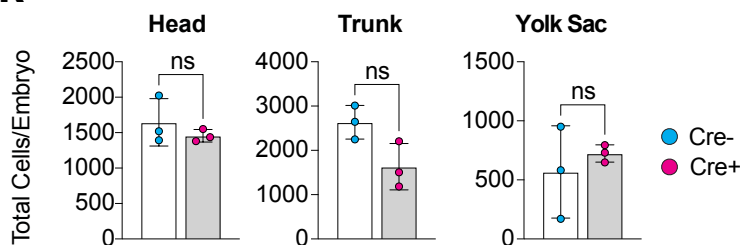



**Supplementary Fig. 7. *Csf1r*<sup>Cre/+</sup>; *Wnk1*<sup>fl/fl</sup> E10.5 and E11.5 embryo characterization.**

**(a, b)** Analysis of *Csf1r*<sup>+/+</sup>; *Wnk1*<sup>fl/fl</sup> and *Csf1r*<sup>Cre/+</sup>; *Wnk1*<sup>fl/fl</sup> E10.5 embryos. Timed pregnancies were performed with *Csf1r*<sup>Cre/+</sup>; *Wnk1*<sup>fl/+</sup> mice bred to *Csf1r*<sup>+/+</sup>; *Wnk1*<sup>fl/fl</sup> mice. **(a)** Embryonic size variation as measured in volume (10<sup>9</sup>μm<sup>3</sup>) at E10.5. Cre<sup>+</sup> embryo (magenta dot) represented in Supplementary Fig. 7b-g falls within the Cre<sup>-</sup> E10.5 embryo (blue) normal size variation. **(b)** 4 pregnant dams were euthanized at E10.5 and embryos were isolated and analyzed using RNA probes identifying erythromyeloid progenitors (*Kit*, purple), macrophages (*Lyve1*, yellow), and fetal liver (*Hhex*, green). Shown are representative images of E10.5 embryos from *Csf1r*<sup>+/+</sup>; *Wnk1*<sup>fl/fl</sup> (Cre<sup>-</sup>; top) and *Csf1r*<sup>Cre/+</sup>; *Wnk1*<sup>fl/fl</sup> (Cre<sup>+</sup>; bottom). Highlighted regions are of the fetal liver (' to '''), the earliest tissue to feature yolk sac-derived erythromyeloid progenitor (EMP) differentiation into tissue-resident macrophages, illustrating the dearth of macrophage presence in Cre<sup>+</sup> mice. Data in (a) is from one representative litter. FACS gating was first performed as shown in Supplementary Fig. 2a.

**(c)** Representative flow plots of embryonic macrophages and erythromyeloid progenitors in the head and trunk regions of Cre<sup>-</sup> embryos (blue plots) and Cre<sup>+</sup> embryos (magenta plots) at E10.5 as cKit<sup>+</sup> cells (grey) and macrophages as F4/80<sup>+</sup> cells (blue) of analysis in Supplementary Fig. 7d-k. FACS gating was first performed as shown in Supplementary Fig. 2a.

**(d-g)** Flow cytometric analysis of embryonic macrophages and EMPs in E10.5 embryos. Shown are summary plots of frequencies and absolute numbers from flow cytometry analysis of F4/80<sup>+</sup> macrophages **(d, e)** and Lin<sup>-</sup> cKit<sup>+</sup> EMPs **(f, g)** in Cre<sup>+</sup> (n=3, magenta dots) and Cre<sup>-</sup> (n=3, blue dots) from E10.5 embryos harvested as in Extended Data Fig. 7b. Data shown with three biological replicates per experiment. Data are shown as mean ± SEM. Statistical significance was determined via independent samples *t*-test. \**p* < .05, \*\**p* < .01, ns = not significant.

**(h-k)** Flow cytometric analysis of embryonic macrophages and EMPs in E11.5 embryos. Shown are summary plots of frequencies and absolute numbers from flow cytometry analysis of F4/80<sup>+</sup> macrophages **(h, i)** and Lin<sup>-</sup> cKit<sup>+</sup> EMPs **(j, k)** in Cre<sup>+</sup> (n=3, magenta dots) and Cre<sup>-</sup> (n=3, blue dots) from E11.5 embryos harvested similar to Supplementary Fig. 7b. Data shown with three biological replicates per experiment. Data are shown as mean ± SEM. Statistical significance was determined via independent samples *t*-test. \**p* < .05, \*\**p* < .01, ns = not significant.

## a Overview of myelopoiesis

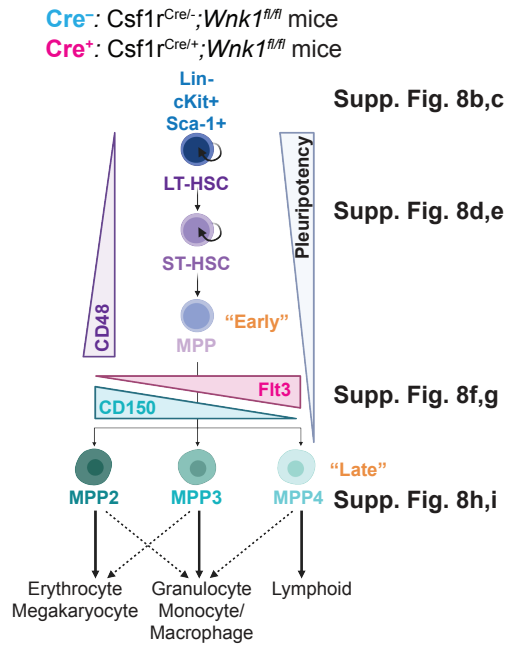

## d Short and long term HSCs

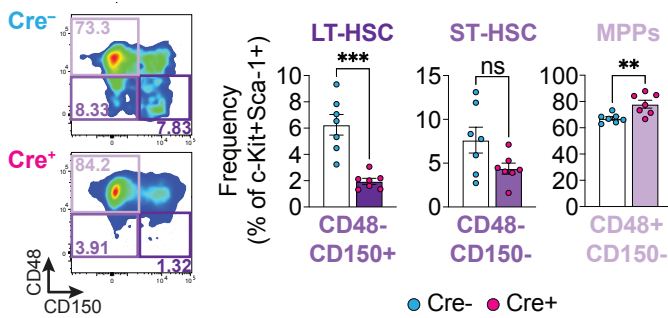

## f Early and late stage MPPs

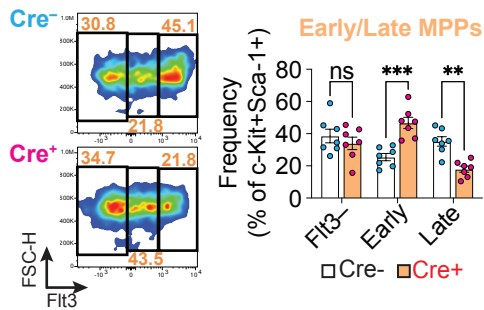

## h Subsets of multipotent progenitor (MPP) cells

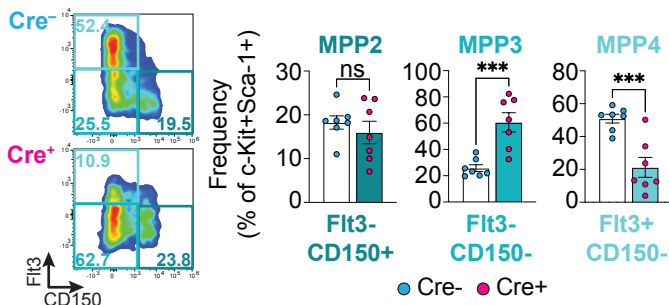

## b Quantification of HSCs

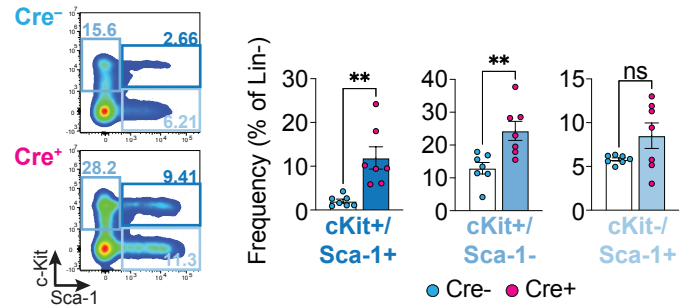

## c Total HSCs (Cell Counts)

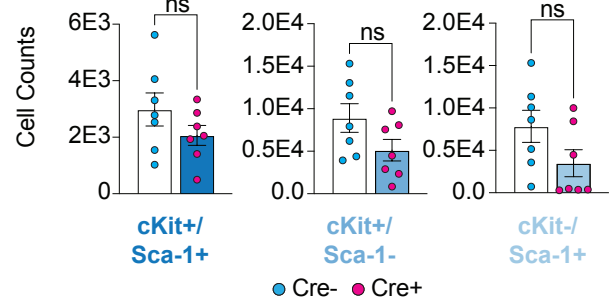

## e Cell counts of short and long term HSCs

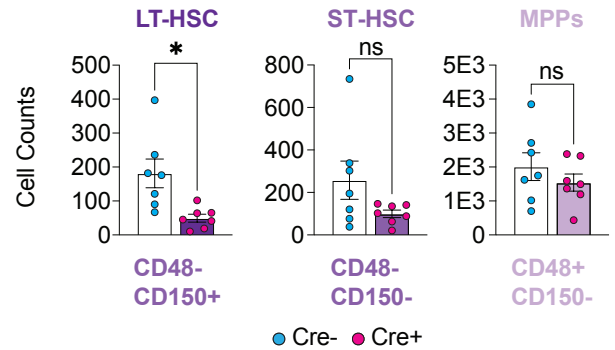

## g Cell counts of early and late stage MPPs

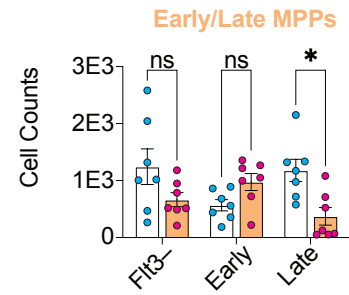

## i Cell counts of multipotent progenitor cells subsets

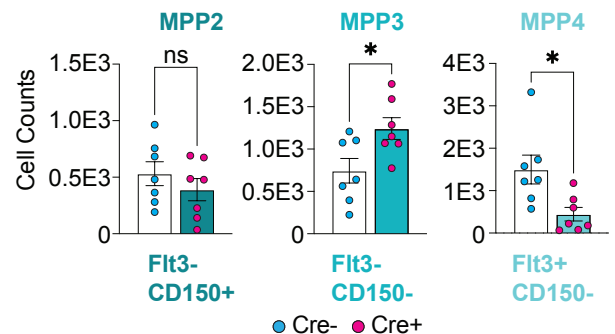

**Supplementary Fig. 8. Analysis of hematopoietic stem and progenitor cell types in *Csf1r<sup>Cre/+</sup>; Wnk1<sup>fl/fl</sup>* mice**

**(a)** Schematic of hematopoiesis with long-term (LT), short-term (ST), and multipotent progenitors (MPPs) with corresponding markers. Also shown is the figure panel that corresponds to the lineage state analyzed. Where possible, bar graph color corresponds to cell color in the schematic. FACS gating was first performed as shown in Supplementary Fig. 2a.

**(b, c)** Quantification of hematopoietic stem cell (HSC) cKit and Sca-1 expression and cell count. **(b)** Representative FACS (*left*) and summary (*right*) plots of cKit and Sca-1 expression in HSCs and **(c)** cell counts of different HSC populations. Bone marrow cells were isolated from three-to-four-week-old mice and were first gated on lineage negative (Lin<sup>-</sup>) cells, then analyzed for cKit and Sca-1 positivity. Data are from n=7 *Csf1r<sup>Cre/+</sup>; Wnk1<sup>fl/fl</sup>* (Cre<sup>-</sup>, blue dots) and n=7 *Csf1r<sup>Cre/+</sup>; Wnk1<sup>fl/fl</sup>* (Cre<sup>+</sup>, magenta dots) mice across four independent experiments. Data are shown as mean ± SEM. Statistical significance was determined via independent samples t-test. \*\**p* < .01, ns = not significant.

**(d, e)** Quantification of LT-HSC, ST-HSC, and early MPP populations. **(d)** Representative FACS (*left*) and summary (*right*) plots of the HSC (defined as Lin<sup>-</sup> cKit<sup>+</sup> Sca-1<sup>+</sup>) subtypes long-term (LT: CD48<sup>-</sup> CD150<sup>+</sup>, dark purple bar), short-term (ST: CD48<sup>-</sup> CD150<sup>-</sup>, purple bar), and multipotent progenitor (MPP: CD48<sup>+</sup> CD150<sup>-</sup>, light purple bar) and **(e)** cell counts. Data are from n=7 Cre<sup>-</sup> (blue dots) and n=7 Cre<sup>+</sup> (magenta dots) mice across four independent experiments. Data are shown as mean ± SEM. Statistical significance was determined via independent samples t-test. \**p* < .05, \*\**p* < .01, \*\*\**p* < .001, ns = not significant.

**(f, g)** Quantification of early and late stage MPPs. **(f)** Representative FACS (*left*) and summary (*right*) plots of Flt3 negative (Flt3<sup>-</sup>), early (Flt3<sup>low</sup>), and late (Flt3<sup>high</sup>) MPPs and **(g)** cell counts. Cells were initially gated as CD48<sup>+</sup> CD150<sup>-</sup>. Data are from n=7 Cre<sup>-</sup> (blue dots) and n=7 Cre<sup>+</sup> (magenta dots) mice across four independent experiments. Data are shown as mean ± SEM. Statistical significance was determined via one-way ANOVA. \**p* < .05, \*\**p* < .01, \*\*\**p* < .001, ns = not significant.

**(h, i)** Quantification of MPP subsets. **(h)** Representative FACS (*left*) and summary (*right*) plots of the following MPP subsets: MPP2 (erythrocyte/megakaryocyte lineage, dark green bar), MPP3 (granulocyte/monocyte/macrophage lineage, green bar), and MPP4 (lymphoid lineage, light green bar) and **(i)** cell counts. Data are from n=7 Cre<sup>-</sup> (blue dots) and n=7 Cre<sup>+</sup> (magenta dots) mice across four independent experiments. Data are shown as mean ± SEM. Statistical significance was determined via independent samples t-test. \**p* < .05, \*\*\**p* < .001, ns = not significant.

**a** Cytokine treatment - differentiation strategy

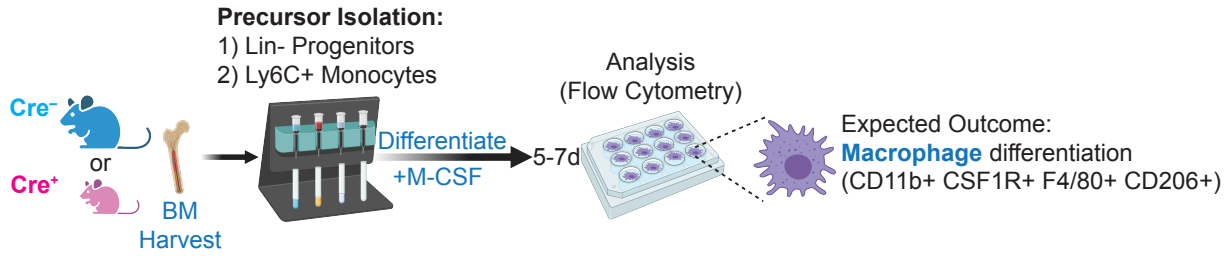

**b** Cell yields of **progenitors** with M-CSF treatment

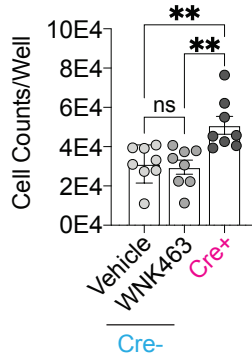

**c** Cell yields of **monocytes** with M-CSF treatment

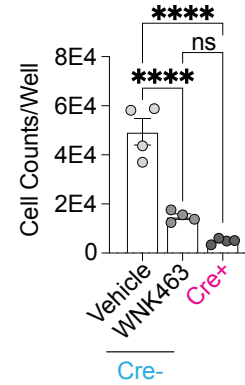

**d** Surface markers of **progenitors** with M-CSF treatment

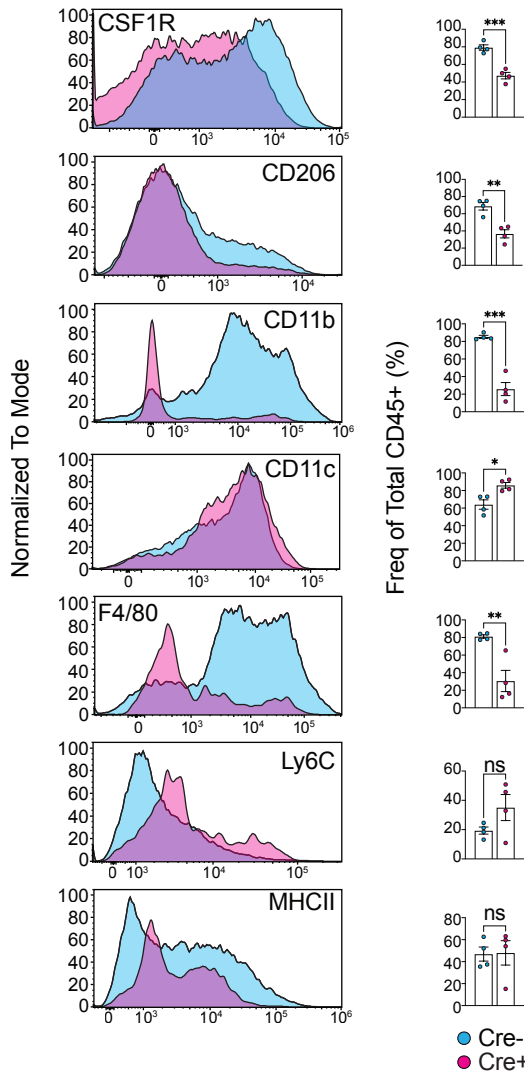

**e** Surface markers of **monocytes** with M-CSF treatment

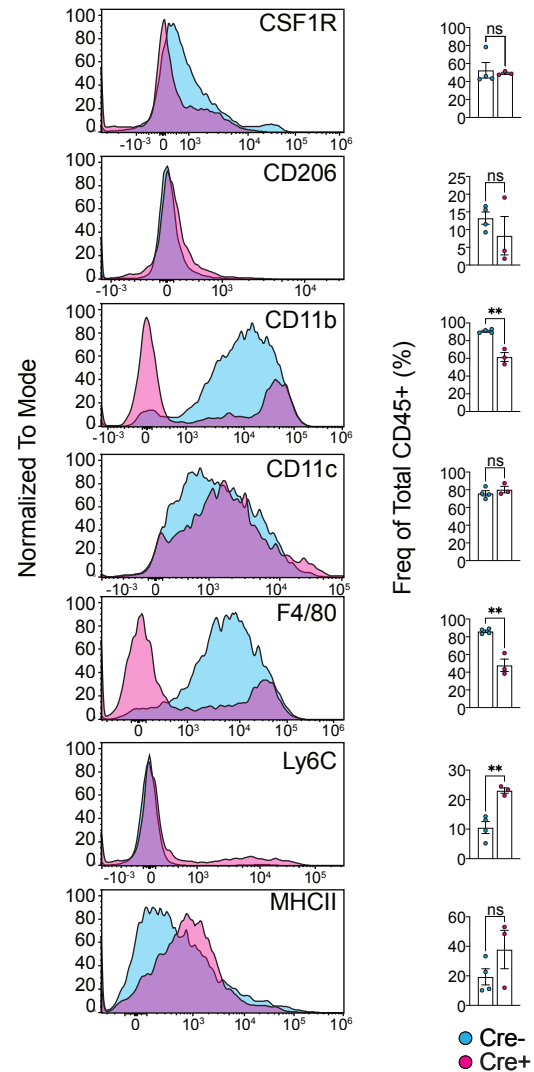

**Supplementary Fig. 9. *Csf1r*<sup>Cre+</sup>; *Wnk1*<sup>fl/fl</sup> cells do not become canonical macrophages.**

**(a)** Shown is the experimental strategy used to test macrophage differentiation of bone marrow Lin- progenitors or monocytes from *Csf1r*<sup>Cre+</sup>; *Wnk1*<sup>fl/fl</sup> (Cre+, blue) or *Csf1r*<sup>Cre-</sup>; *Wnk1*<sup>fl/fl</sup> (Cre-magenta) mice in response to M-CSF.

**(b, c)** Analysis of total cell yields from M-CSF-treated mouse bone marrow **(b)** bone marrow Lin-progenitors and **(c)** Ly6C+ monocytes from **Fig. 2a, b**. Data are representative of three independent experiments. Summary plots are shown as mean  $\pm$  SEM. Statistical significance was assessed via independent samples *t*-test. \*\**p* < .01, \*\*\*\**p* < .0001, ns = not significant.

**(d, e)** Representative flow cytometry plots and summary data of CSF1R, CD206, CD11b, CD11c, F4/80, Ly6C, and MHCII in bone marrow Lin- progenitors **(b)** or Ly6C+ monocytes **(c)** treated with M-CSF as in **(a)**. Data are representative of three independent experiments and shown as mean  $\pm$  SEM. Statistical significance was determined via independent samples *t*-test. \**p* < .05, \*\**p* < .01, \*\*\**p* < .001, ns = not significant. FACS gating was first performed as shown in Supplementary Fig. 2a.

**a** Analysis of **macrophage** frequencies in irradiated mice

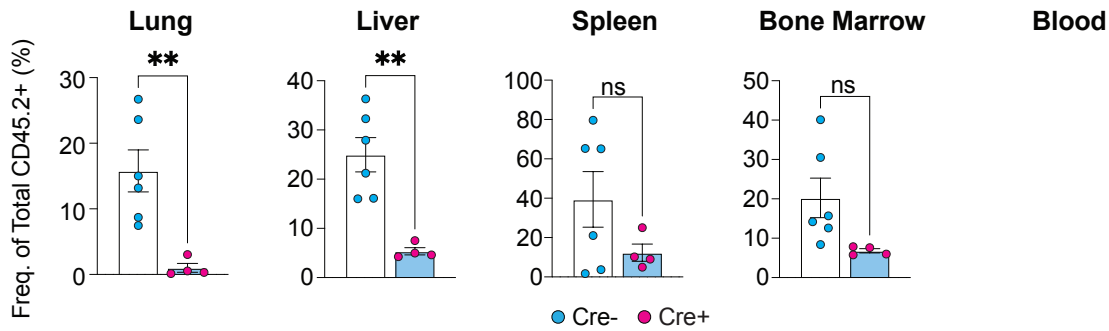

**b** Analysis of **neutrophil** frequencies in irradiated mice

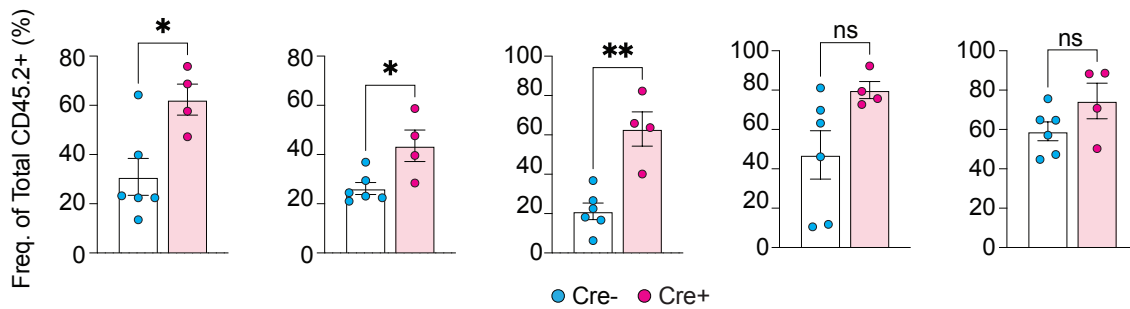

**c** Analysis of **Ly6C+ monocyte** frequencies in irradiated mice

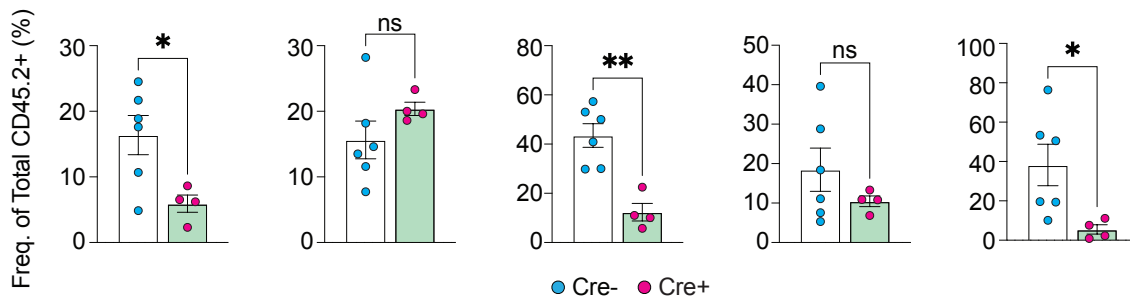

**d** Analysis of **CX<sub>3</sub>CR1+ monocyte** frequencies in irradiated mice

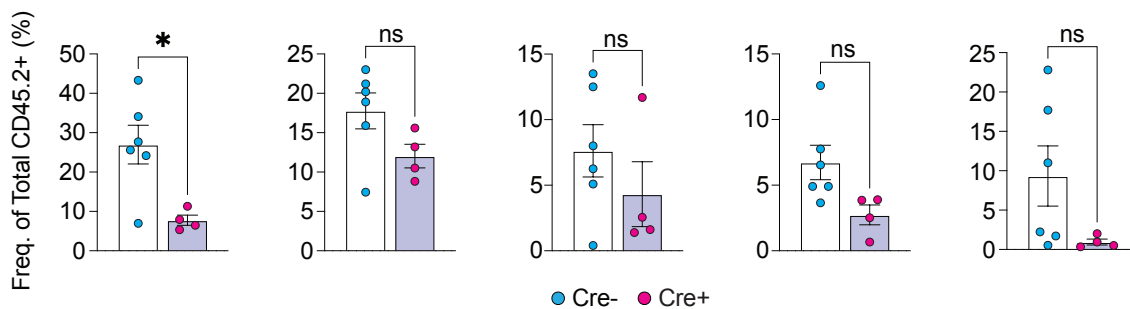

**Supplementary Fig. 10. Myeloid cell frequencies in bone marrow transplantation experiments.**

**(a-d)** Analysis of **(a)** macrophages, **(b)** neutrophils, **(c)** Ly6C<sup>+</sup> monocytes, and **(d)** CX<sub>3</sub>CR1<sup>+</sup> monocytes arising from Cre<sup>-</sup> (Cre<sup>-</sup> CD45.2<sup>+</sup> donor progenitors into wildtype CD45.1<sup>+</sup> adult mice; blue dots) and Cre<sup>+</sup> (Cre<sup>+</sup> CD45.2<sup>+</sup> donor progenitors into wildtype CD45.1<sup>+</sup> adult mice; magenta dots, shaded bars) across tissues analyzed as in **Fig. 2d, e**. Data are pooled from two independent experiments, with three (Cre<sup>-</sup>, n=6 total) or two (Cre<sup>+</sup>, n=4 total) mice per group. Data are shown as mean  $\pm$  SEM. Statistical significance was determined via independent samples *t*-test. \**p* < .05, \*\**p* < .01, ns = not significant. FACS gating was first performed as shown in Supplementary Fig. 2a.



**a**

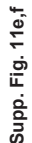

## b

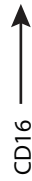

**C**

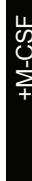

**d**

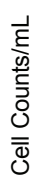

**e**

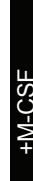**f**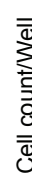

**a**

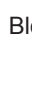

# h

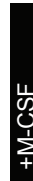

## i

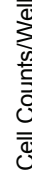

## i

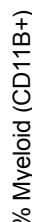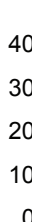

**Supplementary Fig. 11. Human cells do not differentiate into macrophages in the presence of WNK463.**

**(a, b)** Analysis of human pluripotent stem cell (iPSC)-derived macrophage differentiation in response to M-CSF. Shown is the experimental strategy **(a)** and flow cytometry gating strategy **(b)** used to test the effect of inhibition of WNK kinase activity (via WNK463) on differentiation of human iPSCs into myeloid progenitors and myeloid progenitors into macrophages. Also shown is the figure panel that corresponds to the state of differentiation being analyzed. Human macrophages were quantified based on expression of CD11B<sup>+</sup>, CD14<sup>Low</sup>, CD16<sup>High</sup>, CSF1R<sup>+</sup>, CD206<sup>+</sup>, and CD86<sup>+</sup>. Human monocytes were quantified based on expression of CD11B<sup>+</sup>, CD14<sup>High</sup>, CD16<sup>Low</sup>, CD206<sup>-</sup>, and CD86<sup>-</sup>. Human neutrophils were gated based on expression of CD11B<sup>+</sup>, CD16<sup>mid</sup>, CD14<sup>Low</sup>, CD15<sup>+</sup>, and CD66B<sup>+</sup>.

**(c, d)** Perturbation of WNK kinase activity blocks maturation of human embryoid bodies (EBs) into myeloid progenitors. Representative images **(c)** and quantitation **(d)** of myeloid progenitor numbers from experiments performed as detailed in Extended Data Fig. 11a. Pooled data are from four independent experiments with one-to-two biological replicates (unique donors) per experiment. Data are shown as mean  $\pm$  SEM. Statistical significance was determined via independent samples *t*-test. \*\*\*\**p* < .0001. Scale bar, 150 $\mu$ m.

**(e, f)** Perturbation of WNK kinase activity prevents differentiation of human EMPs into mature macrophages. Representative images **(e)** and quantitation of total cell numbers **(f)** as detailed in **Fig. 2g**. Pooled data are from four independent experiments with one-to-two biological replicates (unique donors) per experiment. Data are shown as mean  $\pm$  SEM. Statistical significance was determined via independent samples *t*-test. \*\*\**p* < .001. Scale bar, 20 $\mu$ m. See also Extended Data Fig. 12a for flow cytometry characterization of cell-surface proteins.

**(g)** Analysis of human blood monocyte-derived macrophage differentiation in response to M-CSF. Shown is the experimental strategy used to test the effect of WNK protein function inhibition (via WNK463) on differentiation of human blood monocytes into macrophages.

**(h, i)** Perturbation of WNK function blocks maturation of human blood monocytes into mature macrophages. Representative images **(h)** and quantitation of total cell numbers **(i)** as detailed in **Fig. 2h**. Pooled data are from four independent experiments with two biological replicates (unique male and female donors) per experiment. Data are shown as mean  $\pm$  SEM. Statistical significance was determined via independent samples *t*-test. \**p* < .05. Scale bar, 20 $\mu$ m. See also Extended Data Fig. 12b for flow cytometry characterization of cell-surface proteins.

**(j)** Experiments were performed as in Extended Data Fig. 11e and f, except using a dose titration curve of WNK463 up to the highest tolerable dose (50  $\mu$ M). Pooled data are from four independent experiments with one-to-two biological replicates (unique donors) per experiment. Data are shown as mean  $\pm$  SEM. Statistical significance was determined via independent samples *t*-test. \*\*\*\**p* < .0001.

**a** Surface markers of **iPSCs** with M-CSF treatment

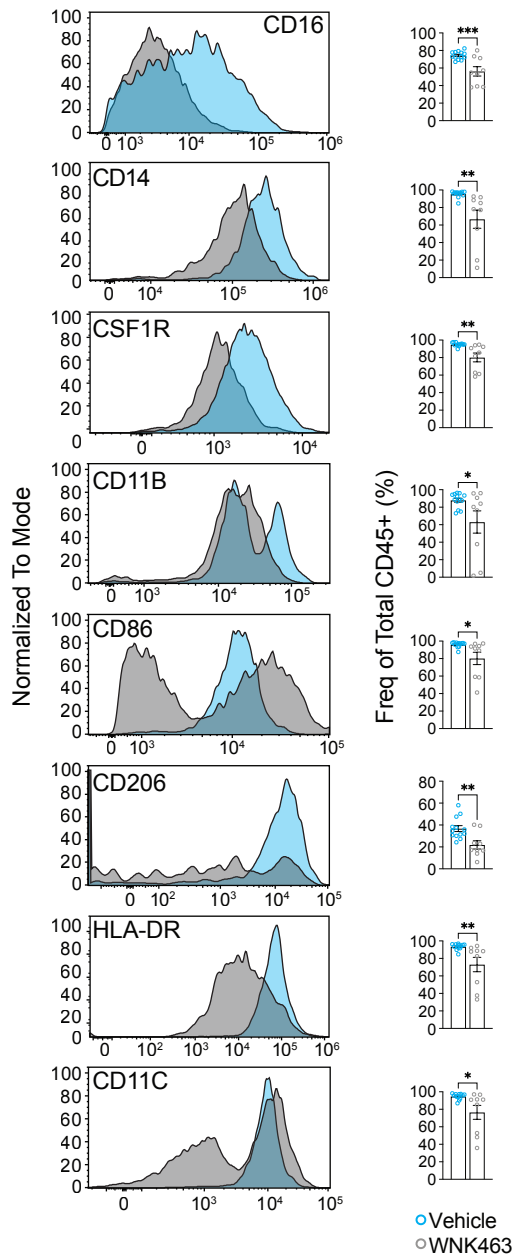

**b** Surface markers of **monocytes** with M-CSF treatment

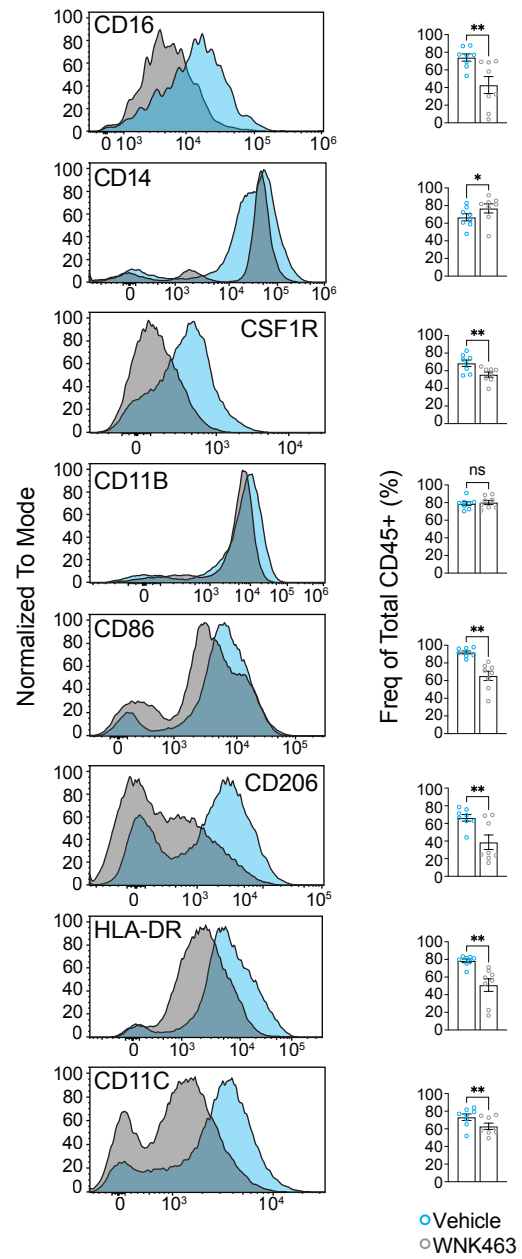

**Supplementary Fig. 12. Human myeloid progenitors and monocytes do not differentiate into macrophages in the presence of WNK463.**

**(a, b)** Representative histograms and summary plots for flow cytometry analysis of human cell surface markers in iPSC-derived myeloid progenitors **(a)** and in human monocytes **(b)** treated with human M-CSF in the presence of vehicle or WNK463 as detailed in **Fig. 2g, h**. Pooled data are from four independent experiments with **(a)** two-three or **(b)** one-to-two biological replicates (unique donors) per experiment. Data are shown as mean  $\pm$  SEM. Statistical significance was determined via independent samples *t*-test. \**p* < .05, \*\**p* < .01, \*\*\**p* < .001, ns = not significant. FACS gating was first performed as shown in Supplementary Fig. 11b.

Experimental timeline diagram showing the adoptive transfer of progenitors into *Csf1r<sup>Cre/+</sup> Wnk1<sup>fl/fl</sup>* mice. The donor mice are *CD45.1 WT*. The recipient mice are *Csf1r<sup>Cre/+</sup> Wnk1<sup>fl/fl</sup>*. The timeline includes three injections of  $1 \times 10^5$  Progenitors (Ext. Fig. 13) or  $1 \times 10^6$  Ly6C<sup>+</sup> Monocytes (Ext. Fig. 14) at P2, P5, and P8. Analysis is performed at P28. The timeline is marked with P2, P5, P8, (P11), and P28. The analysis section shows various organs and a blood sample.

Survival (%)

Time (Weeks)

Cre- (cyan circle)

Cre+ (magenta circle)

Cre- + Donor Cells (cyan square)

Cre+ + Donor Cells (magenta square)

\*\*\*\*

ns

| Time (Weeks) | Cre- (%) | Cre+ (%) | Cre- + Donor Cells (%) | Cre+ + Donor Cells (%) |
|--------------|----------|----------|------------------------|------------------------|
| 0            | 100      | 100      | 100                    | 100                    |
| 1            | 100      | 100      | 100                    | 100                    |
| 2            | 100      | 100      | 100                    | 100                    |
| 3            | 100      | 80       | 100                    | 100                    |
| 4            | 100      | 0        | 100                    | 100                    |
| 52           | 100      | 0        | 100                    | 100                    |

**Brain**

CD45.1 vs CD45.2: 0.58, 2.00, 50.5, 46.9

Ly6C vs Ly6G: 12.7, 5.39

F4/80 vs Ly6C: 90.1

**Lung**

CD45.1 vs CD45.2: 11.3, 3.76, 30.3, 54.6

SiglecF vs CD11c: 93.8

Ly6C vs Ly6G: 7.67, 30.2

Figure 3 displays five bar graphs showing the frequency of myeloid cells in different tissues: Microglia, Alveolar, Kupffer, Splenic MΦ, and BMM. The y-axis represents the frequency of myeloid cells (%). The x-axis shows the Cre Recipient (-) and Donor Cells (-) conditions. Statistical significance is indicated by asterisks (\*, \*\*, \*\*\*, \*\*\*\*) and 'ns' for non-significant.

| Tissue     | Cre Recipient | Donor Cells | Frequency (%) | Significance |
|------------|---------------|-------------|---------------|--------------|
| Microglia  | -             | -           | ~90           | ****         |
|            | +             | -           | ~85           |              |
|            | -             | +           | ~85           |              |
|            | +             | +           | ~15           |              |
| Alveolar   | -             | -           | ~20           | ns           |
|            | +             | -           | ~1            |              |
|            | -             | +           | ~12           |              |
|            | +             | +           | ~12           |              |
| Kupffer    | -             | -           | ~14           | **           |
|            | +             | -           | ~1            |              |
|            | -             | +           | ~8            |              |
|            | +             | +           | ~8            |              |
| Splenic MΦ | -             | -           | ~45           | **           |
|            | +             | -           | ~1            |              |
|            | -             | +           | ~28           |              |
|            | +             | +           | ~28           |              |
| BMM        | -             | -           | ~3            | ns           |
|            | +             | -           | ~0.5          |              |
|            | -             | +           | ~2.5          |              |
|            | +             | +           | ~2.5          |              |

**Figure 3: Myeloid cell frequencies in various tissues.**

The figure consists of five bar graphs showing the frequency of myeloid cells (%) in Brain, Lung, Liver, Spleen, and Bone Marrow. Each graph compares three groups: Cre Recipient - (blue), Cre Recipient + (white), and Donor Cells + (pink). Statistical significance is indicated by asterisks (\*, \*\*, \*\*\*, \*\*\*\*) and 'ns' for non-significant.

| Tissue      | Cre Recipient | Donor Cells | Frequency (%) | Significance |
|-------------|---------------|-------------|---------------|--------------|
| Brain       | -             | -           | ~2            | ****         |
|             | +             | -           | ~25           |              |
|             | +             | +           | ~28           |              |
| Lung        | -             | -           | ~35           | * ns         |
|             | +             | -           | ~65           |              |
|             | +             | +           | ~55           |              |
| Liver       | -             | -           | ~50           | * ns         |
|             | +             | -           | ~65           |              |
|             | +             | +           | ~60           |              |
| Spleen      | -             | -           | ~25           | ****         |
|             | +             | -           | ~65           |              |
|             | +             | +           | ~35           |              |
| Bone Marrow | -             | -           | ~90           | ****         |
|             | +             | -           | ~60           |              |
|             | +             | +           | ~95           |              |

**Figure 3: Frequency of myeloid cells in various tissues.**

The figure displays five bar graphs showing the frequency of myeloid cells (%) in different tissues: Brain, Lung, Liver, Spleen, and Bone Marrow. The y-axis represents the 'Freq. of Myeloid (%)'. The x-axis for each graph shows three groups: Cre Recipient (Cre-/-, Cre+/+, Cre+/+ Donor Cells) and Donor Cells (Donor Cells-/-, Donor Cells-/-, Donor Cells+/+). Statistical significance is indicated by asterisks (\*, \*\*, \*\*\*) and 'ns' for not significant.

| Tissue      | Cre Recipient | Donor Cells | Approx. Freq. (%) | Significance |
|-------------|---------------|-------------|-------------------|--------------|
| Brain       | -             | -           | ~2                | ns           |
|             | +             | -           | ~1                |              |
|             | +             | +           | ~5                |              |
| Lung        | -             | -           | ~25               | ns           |
|             | +             | -           | ~5                |              |
|             | +             | +           | ~30               |              |
| Liver       | -             | -           | ~25               | ns           |
|             | +             | -           | ~5                |              |
|             | +             | +           | ~15               |              |
| Spleen      | -             | -           | ~15               | **           |
|             | +             | -           | ~2                |              |
|             | +             | +           | ~18               |              |
| Bone Marrow | -             | -           | ~1                | ***          |
|             | +             | -           | ~7                |              |
|             | +             | +           | ~2                |              |

Figure 3 consists of five dot plots showing the frequency of myeloid cells (%) in different tissues (Brain, Lung, Liver, Spleen, Bone Marrow) for Cre Recipient and Donor Cells (-, +, +). The y-axis is labeled 'Freq. of Myeloid (%)'. The x-axis for each plot shows the Cre Recipient status (-, +, +) and the Donor Cells status (-, -, +). Statistical significance is indicated by asterisks (\*) and 'ns' (not significant).

| Tissue      | Cre Recipient | Donor Cells | Frequency of Myeloid (%) | Significance |
|-------------|---------------|-------------|--------------------------|--------------|
| Brain       | -             | -           | ~2.5                     | ns           |
|             | +             | -           | ~2.5                     |              |
|             | +             | +           | ~2.5                     |              |
| Lung        | -             | -           | ~11                      | *            |
|             | +             | -           | ~11                      |              |
|             | +             | +           | ~5                       |              |
| Liver       | -             | -           | ~1.5                     | ns           |
|             | +             | -           | ~1.5                     |              |
|             | +             | +           | ~0.5                     |              |
| Spleen      | -             | -           | ~12                      | *            |
|             | +             | -           | ~12                      |              |
|             | +             | +           | ~5                       |              |
| Bone Marrow | -             | -           | ~0.8                     | *            |
|             | +             | -           | ~0.8                     |              |
|             | +             | +           | ~1.8                     |              |

### Supplementary Fig. 13. CD45.1 donor progenitor contribution in Cre<sup>+</sup> recipient mice.

(a) Rescue of macrophage development via neonatal injection of bone marrow Lin<sup>-</sup> progenitors or bone marrow monocytes. Experimental strategy for adoptive transfer of wildtype bone marrow Lin<sup>-</sup> progenitors (Extended Data Fig. 13b-g) or bone marrow monocyte (Extended Data Fig. 14) into *Csf1r*<sup>Cre<sup>+</sup></sup>; *Wnk1*<sup>*fl/fl*</sup> (Cre<sup>+</sup>) or *Csf1r*<sup>Cre<sup>-</sup></sup>; *Wnk1*<sup>*fl/fl*</sup> (Cre<sup>-</sup>) neonatal mice.

(b) Analysis of survival in mice from experiments using bone marrow Lin<sup>-</sup> progenitors as detailed in Extended Data Fig. 13a. Survival curve of Cre<sup>-</sup> mice (blue), Cre<sup>+</sup> mice (magenta), Cre<sup>-</sup> mice injected with wildtype CD45.1<sup>+</sup> bone marrow myeloid progenitors (green), and Cre<sup>+</sup> mice injected with wildtype CD45.1<sup>+</sup> bone marrow myeloid progenitors beginning on perinatal day (P)2 (purple). Mice were monitored daily from birth and euthanized if IACUC-approved criteria were met. Data are from two independent experiments with three mice per group. Differences in survival were determined using the Mantel-Cox test. \*\*\*\* $p < .0001$ , ns = not significant.

(c) Representative flow cytometry plot of the brain (*left*) and lungs (*right*) from Cre<sup>+</sup> recipient mice (CD45.2<sup>+</sup>) injected with CD45.1<sup>+</sup> bone marrow myeloid progenitors as in (a).

(d) Analysis of macrophage reconstitution in mice from experiments using Lin<sup>-</sup> progenitors as detailed in Supplementary Fig. 13a. Summary plots of macrophage frequency as a fraction CD45<sup>+</sup> CD11b<sup>+</sup> (except lung) F4/80<sup>+</sup> cells in the lungs, liver, spleen, and bone marrow of Cre<sup>-</sup> (blue dots, white bars), Cre<sup>+</sup> (magenta dots, white bars), and CD45.1<sup>+</sup> CD11b<sup>+</sup> F4/80<sup>+</sup> cells Cre<sup>+</sup> mice injected with wildtype CD45.1<sup>+</sup> bone marrow Lin<sup>-</sup> progenitors on P2 (magenta dots, blue bars). FACS gating was first performed as shown in Supplementary Fig. 2a.

Data are from two independent experiments with two-to-three mice per group. Data are shown as mean  $\pm$  SEM. Statistical significance was determined via one-way ANOVA. \* $p < .05$ , \*\* $p < .01$ , \*\*\* $p < .001$ , \*\*\*\* $p < .0001$ , ns = not significant.

(e) Analysis of neutrophilia in mice from experiments using Lin<sup>-</sup> progenitors as detailed in Extended Data Fig. 13a. Shown are summary plots of cell frequency as a fraction of CD45<sup>+</sup> CD11b<sup>+</sup> Ly6C<sup>+</sup> Ly6G<sup>+</sup> cells in the brain, lungs, liver, spleen, and bone marrow of Cre<sup>-</sup> (blue dots, white bars), Cre<sup>+</sup> (magenta dots, white bars) and CD45.1<sup>+</sup> CD11b<sup>+</sup> Ly6C<sup>+</sup> Ly6G<sup>+</sup> cell in Cre<sup>+</sup> mice injected with wildtype CD45.1<sup>+</sup> bone marrow myeloid progenitors (magenta dots, pink bars). Data are from two independent experiments with two-to-three mice per group. Data are shown as mean  $\pm$  SEM. Statistical significance was determined via one-way ANOVA. \* $p < .05$ , \*\*\* $p < .001$ , \*\*\*\* $p < .0001$ , ns = not significant.

(f, g) Analysis of (f) Ly6C<sup>+</sup> monocyte and (g) CX<sub>3</sub>CR1<sup>+</sup> monocyte frequencies from bone marrow Lin<sup>-</sup> progenitor transfer experiments as detailed in Extended Data Fig. 13a. (f) Shown are summary plots of cell frequency of CD45<sup>+</sup> CD11b<sup>+</sup> F4/80<sup>-</sup> Ly6C<sup>+</sup> as a fraction of myeloid (CD45<sup>+</sup> CD11b<sup>+</sup>) cells in the brain, lungs, liver, spleen, and bone marrow of Cre<sup>-</sup> (blue dots, white bar), Cre<sup>+</sup> (magenta dots, white bar), and frequencies of CD45.1<sup>+</sup> CD11b<sup>+</sup> F4/80<sup>-</sup> Ly6C<sup>+</sup> Cre<sup>+</sup> mice injected with wildtype CD45.1<sup>+</sup> bone marrow myeloid progenitors (magenta dots, green bars). (g) Shown are summary plots of cell frequency of CD45<sup>+</sup> CD11b<sup>+</sup> F4/80<sup>-</sup> Ly6C<sup>-</sup> CX<sub>3</sub>CR1<sup>+</sup> as a fraction of myeloid (CD45<sup>+</sup> CD11b<sup>+</sup>) cells in the brain, lungs, liver, spleen, and bone marrow of Cre<sup>-</sup> (blue dots, white bar), Cre<sup>+</sup> (magenta dots, white bar), and frequencies of CD45.1<sup>+</sup> CD11b<sup>+</sup> F4/80<sup>-</sup> Ly6C<sup>+</sup> Cre<sup>+</sup> mice injected with wildtype CD45.1<sup>+</sup> bone marrow myeloid progenitors (magenta dots, purple bars). Data are from two independent experiments with two-to-three mice per group. Data are shown as mean  $\pm$  SEM. Statistical significance was determined via one-way ANOVA. \* $p < .05$ , \*\* $p < .01$ , ns = not significant.

**a** Survival curve of **monocyte**-rescued mice

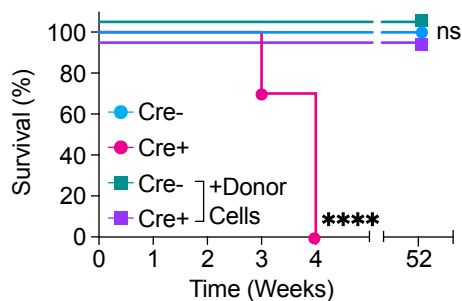

**b** Monocyte-rescued **macrophage** reconstitution

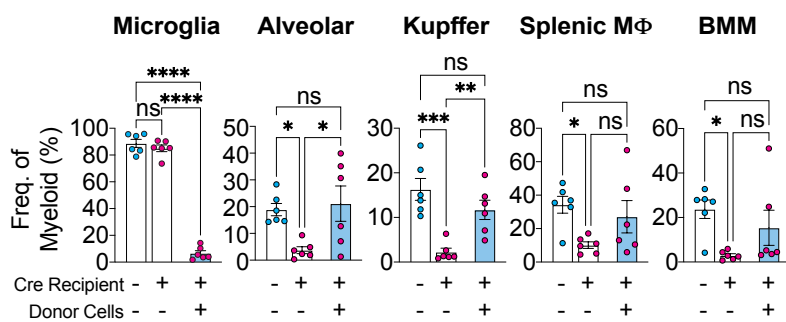

**c** Analysis of **neutrophilia** in **monocyte**-rescued mice

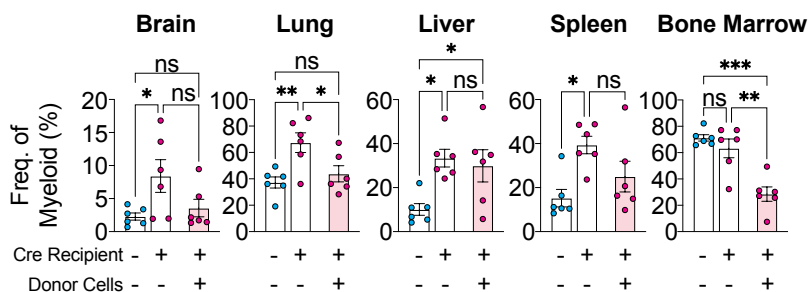

**d** Analysis of **Ly6C<sup>+</sup> monocytes** in **monocyte**-rescued mice

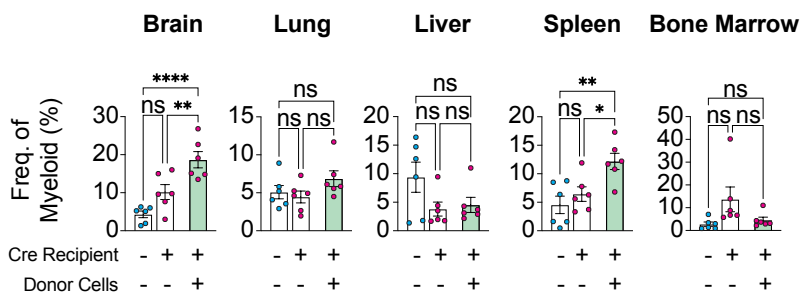

**e** Analysis of **CX<sub>3</sub>CR1<sup>+</sup> monocytes** in **monocyte**-rescued mice

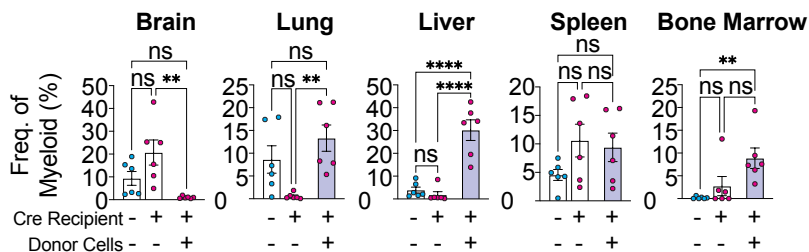



**Supplementary Fig. 14. CD45.1 donor monocyte contribution in Cre<sup>+</sup> recipient mice.**

**(a)** Analysis of survival in mice from experiments using bone marrow monocytes as detailed in Supplementary Fig. 13a. Survival curve of Cre<sup>-</sup> mice (blue), Cre<sup>+</sup> mice (magenta), Cre<sup>-</sup> mice injected with wildtype CD45.1<sup>+</sup> bone marrow monocytes (green), and Cre<sup>+</sup> mice injected with wildtype CD45.1<sup>+</sup> bone marrow monocytes beginning on perinatal day (P)2 (purple). Mice were monitored daily from birth and euthanized if IACUC-approved criteria were met. Data are from two independent experiments with three mice per group. Differences in survival were determined using the Mantel-Cox test. \*\*\*\* $p < .0001$ , ns = not significant.

**(b)** Analysis of macrophage reconstitution in mice from experiments using bone marrow Ly6C<sup>+</sup> monocytes as detailed in Supplementary Fig. 13a. Summary plots of macrophage frequency as a fraction CD45<sup>+</sup> CD11b<sup>+</sup> (except lung) F4/80<sup>+</sup> cells in the lungs, liver, spleen, and bone marrow of Cre<sup>-</sup> (blue dots, white bars), Cre<sup>+</sup> (magenta dots, white bars), and CD45.1<sup>+</sup> CD11b<sup>+</sup> F4/80<sup>+</sup> cells Cre<sup>+</sup> mice injected with wildtype CD45.1<sup>+</sup> bone marrow monocytes on P2 (magenta dots, blue bars). Data are from two independent experiments with three mice per group. Data are shown as mean  $\pm$  SEM. Statistical significance was determined via one-way ANOVA. \* $p < .05$ , \*\* $p < .01$ , \*\*\* $p < .001$ , \*\*\*\* $p < .0001$ , ns = not significant. FACS gating was first performed as shown in Supplementary Fig. 2a.

**(c)** Analysis of neutrophilia in mice from experiments using bone marrow Ly6C<sup>+</sup> monocytes as detailed in Supplementary Fig. 13a. Shown are summary plots of cell frequency as a fraction of CD45<sup>+</sup> CD11b<sup>+</sup> Ly6C<sup>+</sup> Ly6G<sup>+</sup> cells in the brain, lungs, liver, spleen, and bone marrow of Cre<sup>-</sup> (blue dots, white bars), Cre<sup>+</sup> (magenta dots, white bars) and CD45.1<sup>+</sup> CD11b<sup>+</sup> Ly6C<sup>+</sup> Ly6G<sup>+</sup> cell in Cre<sup>+</sup> mice injected with wildtype CD45.1<sup>+</sup> bone marrow monocytes (magenta dots, pink bars). Data are from two independent experiments with three mice per group. Data are shown as mean  $\pm$  SEM. Statistical significance was determined via one-way ANOVA. \* $p < .05$ , \*\* $p < .01$ , \*\*\* $p < .001$ , ns = not significant.

**(d, e)** Analysis of **(d)** Ly6C<sup>+</sup> monocyte and **(e)** CX<sub>3</sub>CR1<sup>+</sup> monocyte frequencies from bone marrow Ly6C<sup>+</sup> monocyte transfer experiments as detailed in Supplementary Fig. 13a. **(d)** Shown are summary plots of cell frequency of CD45<sup>+</sup> CD11b<sup>+</sup> F4/80<sup>-</sup> Ly6C<sup>+</sup> as a fraction of myeloid (CD45<sup>+</sup> CD11b<sup>+</sup>) cells in the brain, lungs, liver, spleen, and bone marrow of Cre<sup>-</sup> (blue dots, white bar), Cre<sup>+</sup> (magenta dots, white bar), and frequencies of CD45.1<sup>+</sup> CD11b<sup>+</sup> F4/80<sup>-</sup> Ly6C<sup>+</sup> Cre<sup>+</sup> mice injected with wildtype CD45.1<sup>+</sup> bone marrow monocytes (magenta dots, green bars). **(e)** Shown are summary plots of cell frequency of CD45<sup>+</sup> CD11b<sup>+</sup> F4/80<sup>-</sup> Ly6C<sup>-</sup> CX<sub>3</sub>CR1<sup>+</sup> as a fraction of myeloid (CD45<sup>+</sup> CD11b<sup>+</sup>) cells in the brain, lungs, liver, spleen, and bone marrow of Cre<sup>-</sup> (blue dots, white bar), Cre<sup>+</sup> (magenta dots, white bar), and frequencies of CD45.1<sup>+</sup> CD11b<sup>+</sup> F4/80<sup>-</sup> Ly6C<sup>+</sup> Cre<sup>+</sup> mice injected with wildtype CD45.1<sup>+</sup> bone marrow monocytes (magenta dots, purple bars). Data are from two independent experiments with three mice per group. Data are shown as mean  $\pm$  SEM. Statistical significance was determined via one-way ANOVA. \* $p < .05$ , \*\* $p < .01$ , \*\*\*\* $p < .0001$ , ns = not significant.

**a** Precursor macropinocytosis strategy

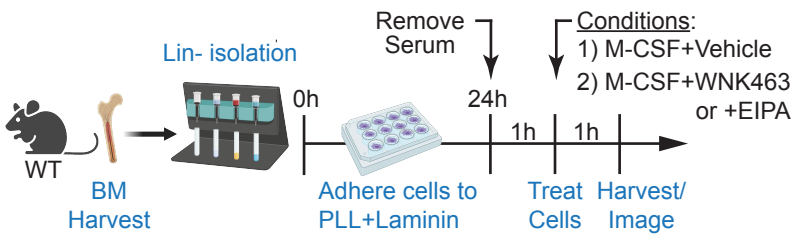

**b** Macropinocytosis inhibitor pathways

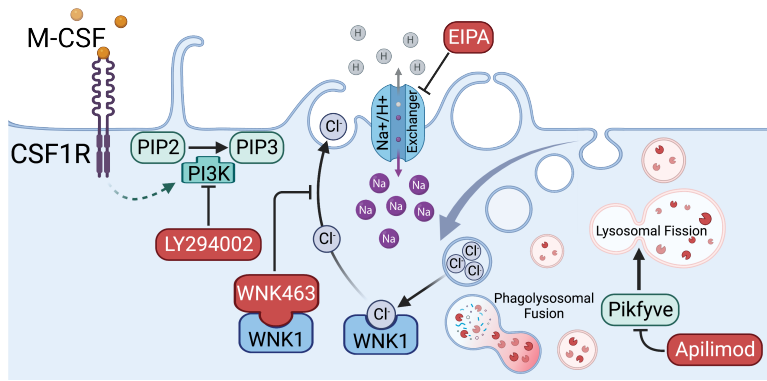

**c** Inhibition of progenitor macropinocytosis – DQ-BSA

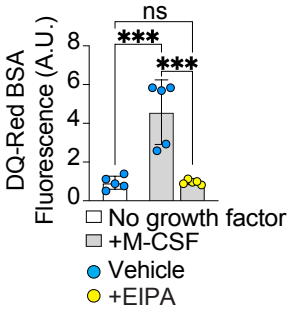

**d** Analysis of macropinocytosis in WNK1-deficient progenitors

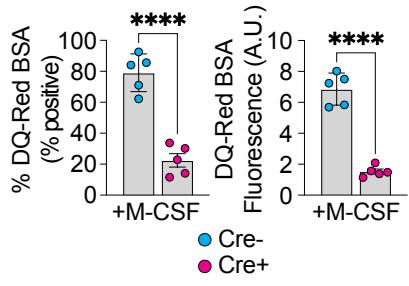

**e** Inhibition of WNK kinase activity during macropinocytosis

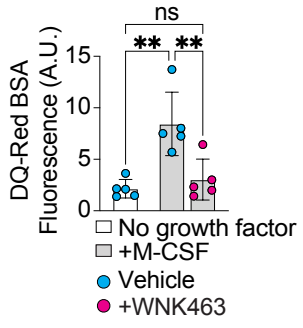

**f** Macropinocytosis during WNK kinase inhibition

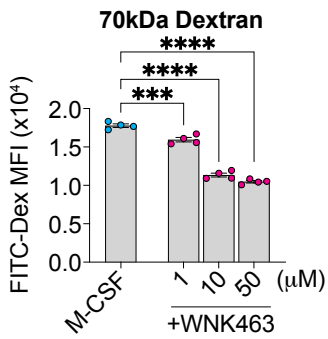

**g** Progenitor macropinocytosis – Flow Cytometry

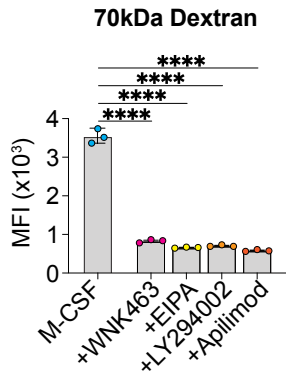

**h** Progenitor macropinocytosis – Microscopy

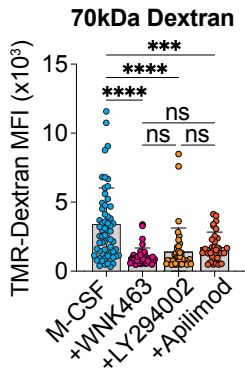

**Supplementary Fig. 15. Analysis of M-CSF-stimulated macropinocytosis in bone marrow progenitors.**

**(a)** Strategy for analyzing M-CSF-induced macropinocytosis using myeloid progenitors. Shown is the experimental strategy used to determine if bone marrow myeloid progenitors perform macropinocytosis in response to M-CSF and if WNK1 is required for this process.

**(b)** Methods for disrupting macropinocytosis. Shown is a model of macropinocytosis with strategies used to disrupt this process. EIPA - 5-[N-ethyl-N-isopropyl] amiloride. PIP2 - Phosphatidylinositol 4,5-bisphosphate. PIP3 - Phosphatidylinositol (3,4,5)-trisphosphate. PI3K - Phosphoinositide 3-kinase. PIKfyve - Phosphoinositide kinase, FYVE-type zinc finger containing.

**(c)** Bone marrow myeloid progenitors perform macropinocytosis in response to M-CSF. Analysis of DQ-Red BSA internalization in bone marrow myeloid progenitors isolated and stimulated with M-CSF. In conjunction with M-CSF, the putative macropinocytosis substrate DQ-Red bovine serum albumin (BSA) was added to cells and incubated for 1h in the presence of either vehicle or the macropinocytosis inhibitor EIPA. Quantitation (fluorescence intensity in arbitrary units (A.U.)) of DQ-Red BSA is shown. Data is representative of two independent experiments with two to three biological replicates per experiment (n=5 per condition). Data are shown as mean  $\pm$  SEM. Statistical significance was determined via one-way ANOVA. \*\*\* $p < .001$ , ns = not significant.

**(d)** WNK1 is required for M-CSF-stimulated macropinocytosis by bone marrow myeloid progenitors. Bone marrow myeloid progenitors from *Csf1r<sup>Cre+</sup>; Wnk1<sup>fl/fl</sup>* (Cre+) or *Csf1r<sup>Cre-</sup>; Wnk1<sup>fl/fl</sup>* (Cre-) mice were isolated and stimulated with M-CSF and DQ-Red BSA as in **Fig. 3a**. Flow cytometry quantitation of frequencies of macropinocytotic (DQ-Red BSA+) progenitors (*left*) and fluorescence intensity in arbitrary units (A.U.) of DQ-Red BSA (*right*) are shown. Data is from two independent experiments with two-three mice (biological replicates) per experiment (n=5 per condition). Data are shown as mean  $\pm$  SEM. Statistical significance was determined via independent samples *t*-test. \*\*\*\* $p < .0001$ .

**(e)** WNK kinase activity is required for M-CSF-stimulated macropinocytosis of DQ-Red BSA by bone marrow myeloid progenitors. WT bone marrow myeloid progenitors were isolated and stimulated with M-CSF and DQ-Red BSA as in **(d)**, except in the presence of vehicle or 10 $\mu$ m WNK463. Quantitation (fluorescence intensity in arbitrary units (A.U.)) of DQ-Red BSA+ is shown. Data is representative of two independent experiments with at least two-to-three mice (biological replicates) per experiment (n=5 per condition). Data are shown as mean  $\pm$  SEM. Statistical significance was determined via one-way ANOVA. \*\* $p < .01$ , ns = not significant.

**(f-h)** M-CSF stimulates internalization of 70kDa Dextran by bone marrow myeloid progenitors via WNK kinase activity-dependent macropinocytosis. Experiments performed as in **Fig. 3a** with the WNK kinase activity inhibitor WNK463 (dose titration; **f**) or the macropinocytosis inhibitors EIPA, LY294002, or Apilimod (**g**) were added together with M-CSF. Shown is the summary plot of flow cytometry quantification of FITC-Dextran+ MFI. Data are from three independent experiments (n=3-4 per condition). **(h)** Time-lapse confocal microscopy analysis of M-CSF-induced internalization of 70kDa Dextran by bone marrow myeloid progenitors with WNK463, LY294002, or Apilimod. Quantitation (fluorescence intensity in arbitrary units) of TMR-Dextran+ myeloid progenitors are shown. Each dot is an individual cell, data pooled from three independent experiments. Data are shown as mean  $\pm$  SEM. Statistical significance was determined via one-way ANOVA. \*\*\* $p < .001$ , \*\*\*\* $p < .0001$ , ns = not significant.

**a** Cell Viability – Mouse progenitors

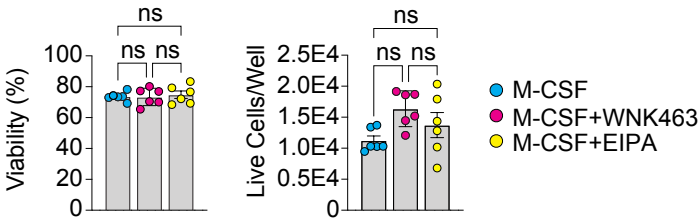

**b** Cell Viability – Mouse EMPs

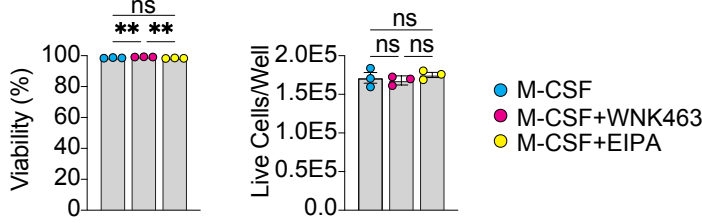

**c** Cell Viability (% Live) – Human iPSC-derived progenitors

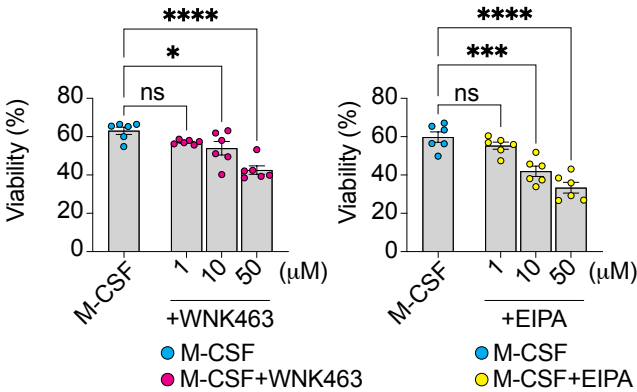

**d** Cell Viability (Counts) – Human iPSC-derived progenitors

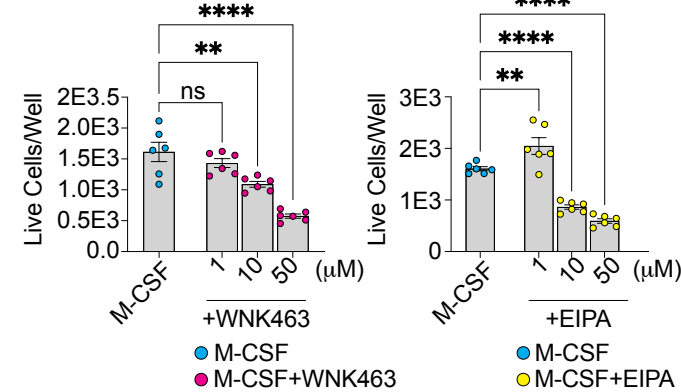

**e** Macropinocytosis during PMA-induced macropinocytosis – mouse progenitors

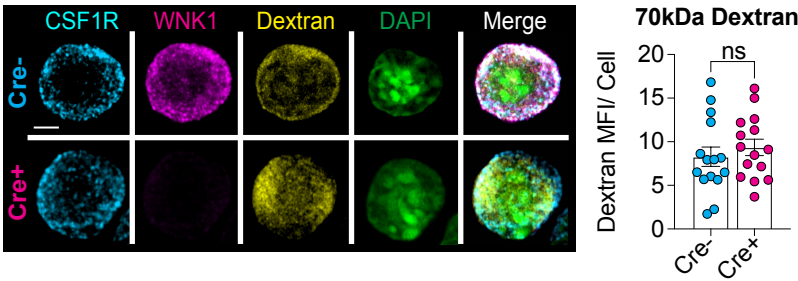

**f** Macropinocytosis during PMA-induced macropinocytosis – human progenitors

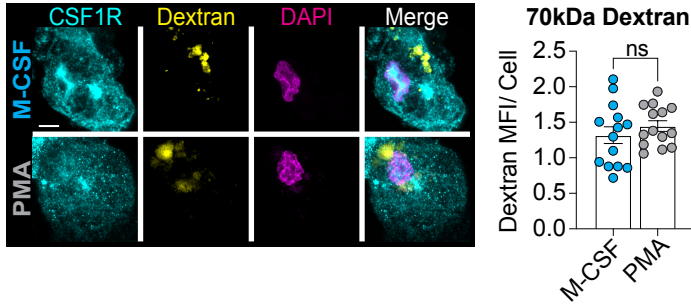

### Supplementary Fig. 16. Macropinocytosis assay cell viability.

**(a, b)** Analysis of cell viability as frequencies of propidium iodide negative cells (*left*) or total live cell yields (*right*) from mouse bone marrow progenitors (**a**) or mouse neonatal erythromyeloid progenitors (**b**) treated with 10 $\mu$ m WNK463 (pink dots) or 10 $\mu$ m EIPA (yellow dots) from **Fig. 4**. Data are shown as mean  $\pm$  SEM. Statistical significance was determined via one-way ANOVA. ns = not significant.

**(c, d)** Analysis of cell viability as frequencies of propidium iodide negative cells (**c**) or total live cell yields (**d**) from human iPSC-derived myeloid progenitors treated with 1, 10 or 50 $\mu$ m of WNK463 (pink dots) or EIPA (yellow dots) from **Fig. 4**. Data are shown as mean  $\pm$  SEM. Statistical significance was determined via one-way ANOVA. \* $p < .05$ , \*\* $p < .01$ , \*\*\* $p < .001$ , \*\*\*\* $p < .0001$ , ns = not significant.

**(e)** Analysis of macropinocytosis in PMA-treated mouse myeloid progenitors. (*Left*) Representative fixed confocal microscopy images of bone marrow myeloid progenitors isolated from *Csf1r*<sup>Cre+</sup>; *Wnk1*<sup>fl/fl</sup> (Cre+) or *Csf1r*<sup>Cre-</sup>; *Wnk1*<sup>fl/fl</sup> (Cre-) cultured with 70kDa Dextran (yellow) and PMA for 1h. Cells were then stained with CSF1R (cyan), WNK1 (magenta), and DAPI (green). Scale bar, 5 $\mu$ m. (*Right*) Quantitation of 70kDa Dextran uptake via MFI per cell on 3D projections of each cell, with n=15 FOVs per group. Data are from four independent experiments. Data are shown as mean  $\pm$  SEM. Statistical significance was determined via independent samples *t*-test. ns = not significant.

**(f)** Analysis of macropinocytosis in PMA-treated human myeloid progenitors. (*Left*) Representative fixed confocal microscopy images of human iPSC-derived myeloid progenitors cultured with 70kDa Dextran (yellow) and PMA for 1h. Cells were then stained with CSF1R (cyan) and DAPI (magenta). Scale bar, 5 $\mu$ m. (*Right*) Quantitation of 70kDa Dextran uptake via MFI per cell, with n=14 FOVs per group. Data are from three independent experiments. Data are shown as mean  $\pm$  SEM. Statistical significance was determined via independent samples *t*-test. ns = not significant.

**a** SPAK phosphorylation during WNK inhibition

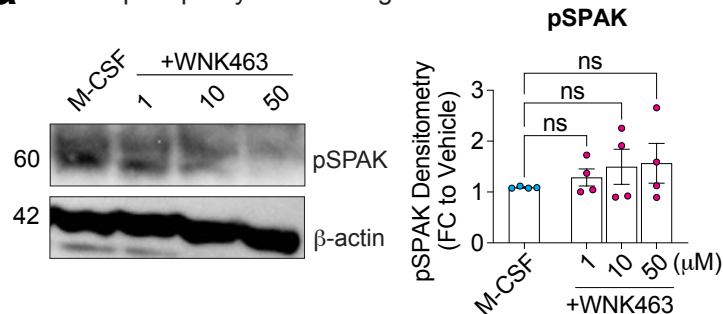

**b** OSR1 phosphorylation during WNK inhibition

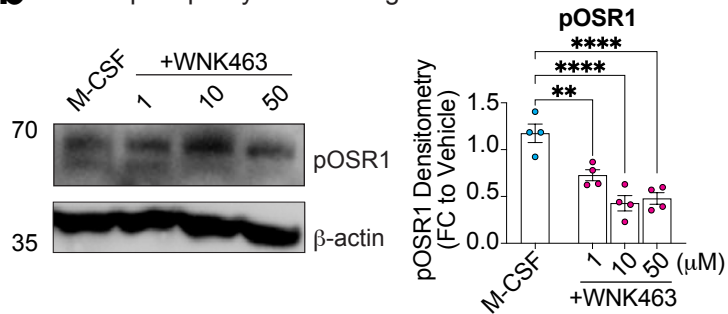

**c** CSF1R and WNK1 expression in Lin<sup>-</sup> progenitors via microscopy

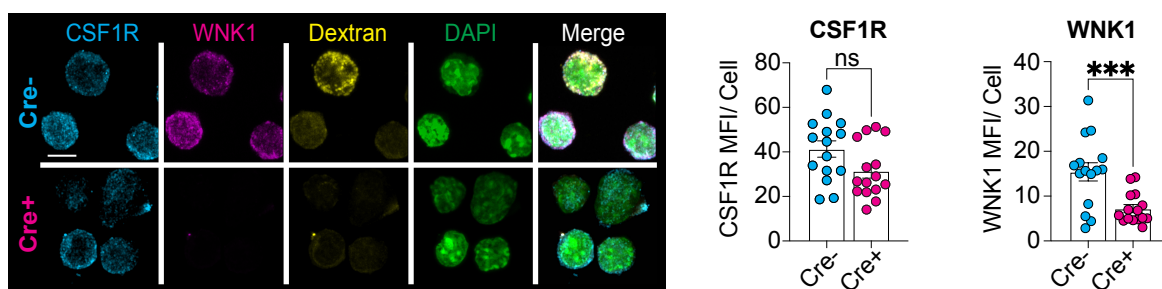

**d** CSF1R trafficking during M-CSF-induced macropinocytosis and WNK463 treatment

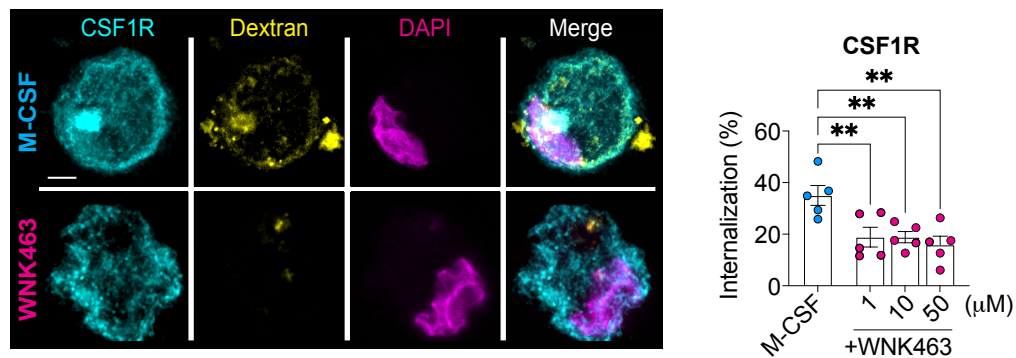

**e** WNK1 trafficking during macropinocytosis inhibition

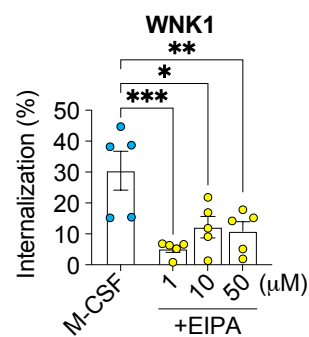



**Supplementary Fig. 17. Inhibition of WNK kinase activity impairs CSF1R internalization and WNK1 translocation.**

**(a, b)** Analysis of SPAK and OSR1 phosphorylation during M-CSF-stimulated macropinocytosis in human myeloid progenitors. Human iPSC-derived myeloid progenitors were stimulated with M-CSF, then assayed for SPAK **(a)** or OSR1 **(b)** phosphorylation after 1h. Shown are representative Phos-tag western blot (*left*) and quantitation (*right*) of pSPAK or pOSR1 phosphorylation. pSPAK and pOSR1 levels were normalized to loading control ( $\beta$ -actin, 42kDa) and then calculated as a fold change (FC) relative to control. Data are pooled from two independent experiments with two biological replicates per condition/experiment. Data are shown as mean  $\pm$  SEM. Statistical significance was determined via one-way ANOVA.  $**p < .01$ ,  $****p < .0001$ , ns = not significant.

**(c)** Analysis of CSF1R and WNK1 expression in M-CSF-treated mouse wildtype (Cre-) and WNK1-deficient (Cre+) myeloid progenitors. (*Left*) Representative fixed confocal microscopy images of myeloid progenitors from experiments in **Fig. 5c**. Scale bar, 5 $\mu$ m. (*Right*) Quantitation of CSF1R and WNK1 protein expression. Each dot represents the average MFI per field of view (FOV) divided by the number of cells per region, with n=15 FOVs per group. Data are from four independent experiments. Data are shown as mean  $\pm$  SEM. Statistical significance was determined via independent samples *t*-test.  $***p < .001$ , ns = not significant.

**(d)** Analysis of CSF1R internalization in WNK463-treated human myeloid progenitors. (*Left*) Representative fixed confocal microscopy images of human myeloid progenitors treated with 70kDa Dextran (yellow), M-CSF, and either 1 $\mu$ M, 10 $\mu$ M (shown), or 50 $\mu$ M WNK463 for 1h. Cells were subsequently stained for CSF1R (cyan) and DAPI (magenta). Scale bar, 5 $\mu$ m. (*Right*) Quantitation of CSF1R internalization based on Manders' Overlap Coefficient (MCC%), with each dot representing the MCC% overlap per cell, with n=5 FOVs per group. Data representative of three independent experiments. Data are shown as mean  $\pm$  SEM. Statistical significance was determined via one-way ANOVA.  $**p < .01$ .

**(e)** Analysis of macropinocytosis-dependent WNK1 nuclear translocation in human myeloid progenitors. Human iPSC-derived myeloid progenitors were stimulated with M-CSF in the presence of vehicle or EIPA at the indicated concentrations for 1h. Shown is quantitation of WNK1 nuclear localization based on MCC% with DAPI. Each dot represents the WNK1/DAPI MCC% overlap per cell, with n=5 FOVs per group. Data are from five independent experiments. Data are shown as mean  $\pm$  SEM. Statistical significance was determined via one-way ANOVA.  $*p < .05$ ,  $**p < .01$ ,  $***p < .001$ .

**a** CSF1R trafficking during PMA-induced macropinocytosis– mouse

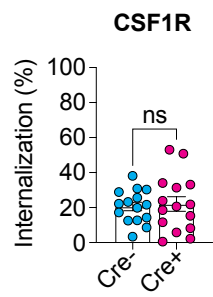

**b** CSF1R trafficking during PMA-induced macropinocytosis– human

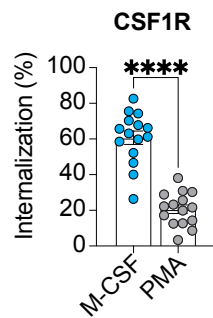

**c** WNK1 trafficking during PMA-induced macropinocytosis – mouse progenitors

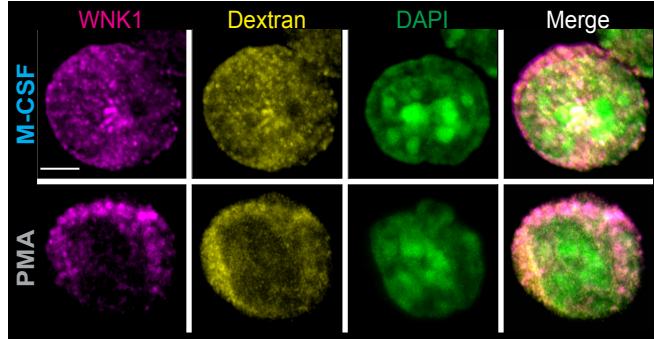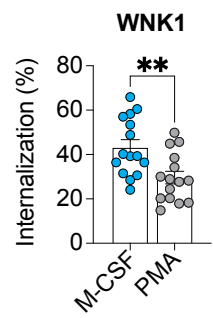

**d** WNK1 trafficking during PMA-induced macropinocytosis – human progenitors

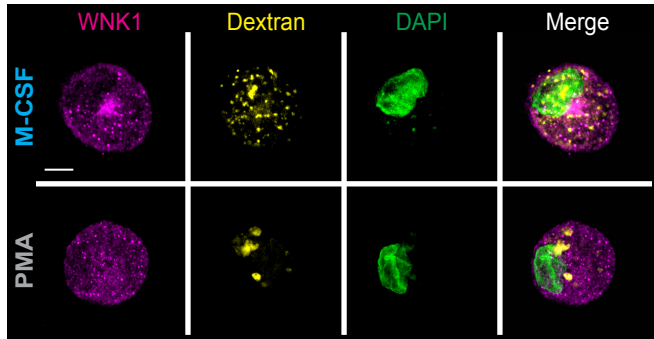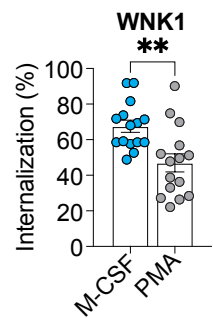

**Supplementary Fig. 18. Analysis of CSF1R internalization and WNK1 localization during PMA-induced macropinocytosis.**

**(a)** Analysis of CSF1R internalization in PMA-treated mouse wildtype (Cre-) and WNK1-deficient (Cre+) myeloid progenitors. Analysis of experiments performed in Extended Data Fig. 16e. Quantitation of CSF1R internalization based on MCC% analyzed on 3D projections of each cell. Each dot represents the CSF1R MCC% overlap per cell, with n=15 FOVs per group. Data are from three independent experiments. Data are shown as mean  $\pm$  SEM. Statistical significance was determined via independent samples *t*-test. ns = not significant.

**(b)** Analysis CSF1R internalization in PMA-treated human myeloid progenitors. Analysis of experiments performed in Extended Data Fig. 16f. Quantitation of CSF1R internalization based on MCC% analyzed on 3D projections of each cell. Each dot represents the CSF1R MCC% overlap per cell, with n=15 FOVs per group. Data are from three independent experiments. Data are shown as mean  $\pm$  SEM. Statistical significance was determined via independent samples *t*-test. \*\*\*\**p* < .0001.

**(c)** Analysis of WNK1 nuclear translocation in PMA-treated mouse myeloid progenitors. (*Left*) Representative fixed confocal microscopy images of mouse bone marrow myeloid progenitors cultured with 70kDa Dextran (yellow) and M-CSF or PMA for 1h. Cells were then stained with WNK1 (magenta) and DAPI (green). Scale bar, 5 $\mu$ m. (*Right*) Quantitation of WNK1 nuclear translocation based on MCC% with DAPI on 3D projections of each cell. Each dot represents the WNK1/DAPI MCC% overlap per cell, with n=15 FOVs per group. Data are from three independent experiments. Data are shown as mean  $\pm$  SEM. Statistical significance was determined via independent samples *t*-test. \*\**p* < .01.

**(d)** Analysis of WNK1 nuclear translocation in PMA-treated human myeloid progenitors. (*Left*) Representative fixed confocal microscopy images of human iPSC-derived EMPs cultured with 70kDa Dextran (yellow) and PMA for 1h. Cells were then stained with WNK1 (magenta) and DAPI (green). Scale bar, 5 $\mu$ m. (*Right*) Quantitation of WNK1 nuclear translocation based on MCC% with DAPI on 3D projections of each cell. Each dot represents the WNK1/DAPI MCC% overlap per cell, with n=20 FOVs per group. Data are from three independent experiments. Data are shown as mean  $\pm$  SEM. Statistical significance was determined via independent samples *t*-test. \**p* < .05.

**a** IRF8 expression during macropinocytosis inhibition  
– mRNA expression

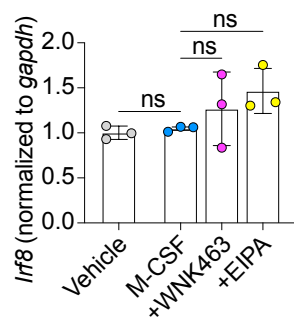

**b** IRF8 induction during WNK1 overexpression  
– mRNA expression

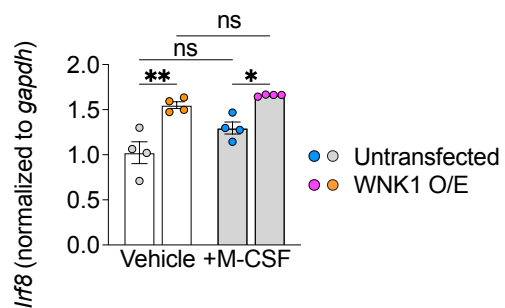

**Supplementary Fig. 19. *Irf8* mRNA expression during WNK1 inhibition and overexpression.**

**(a)** Quantitative PCR analysis of *Irf8* in M-CSF-treated mouse myeloid progenitors. Mouse bone marrow myeloid progenitors were stimulated in the presence of vehicle, M-CSF, or M-CSF with 10 $\mu$ M WNK463 or EIPA for 24h, then isolated and analyzed for *Irf8* expression via qPCR. Data representative of three independent experiments. Data are shown as mean  $\pm$  SEM. Statistical significance was determined via independent samples *t*-test. ns = not significant. See also **Fig. 5f** for corresponding analysis of IRF8 protein.

**(b)** Quantitative PCR analysis of *Irf8* in mouse wildtype cells overexpressing functional WNK1-mRuby. Mouse bone marrow myeloid progenitors transfected with WNK1-mRuby were stimulated with M-CSF 24h, then isolated and analyzed for *Irf8* expression via qPCR. n=4 wildtype mice per group. Data are shown as mean  $\pm$  SEM. Statistical significance was determined via one-way ANOVA. \**p* < .05, \*\**p* < .01. ns = not significant. See also **Fig. 5h** for corresponding analysis of IRF8 protein.

**Supplementary Table 1. Mouse FACS antibodies**

| <b>Antibody</b>     | <b>Clone</b>                                  | <b>Fluorochrome</b>   | <b>Company</b>       | <b>Dilution</b> |
|---------------------|-----------------------------------------------|-----------------------|----------------------|-----------------|
| CD16/32             | 2.4G2                                         | Unconjugated          | BioXCell             | 1:50            |
| CD45                | 30-F11                                        | AF700                 | BioLegend            | 1:400           |
| CD11b               | M1/70                                         | APC- e780, FITC       | Invitrogen           | 1:800           |
| SiglecF             | S17007L                                       | APC                   | BioLegend            | 1:400           |
| F4/80               | BM8                                           | FITC                  | Invitrogen           | 1:200           |
| F4/80               | BM8                                           | BV605, APC            | BioLegend            | 1:200           |
| Ly6C                | HK1.4                                         | PerCP-Cy5.5           | BioLegend            | 1:400           |
| Ly6C                | AL-21                                         | PE                    | BD Pharmingen        | 1:400           |
| Ly6G                | 1A8                                           | PE-Cy7                | Tonbo<br>Biosciences | 1:200           |
| Ly6G                | 1A8                                           | PE                    | BioLegend            | 1:200           |
| CD11c               | N418                                          | FITC                  | Invitrogen           | 1:800           |
| CD11c               | N418                                          | PE-Cy7, BV785         | BioLegend            | 1:800           |
| MHCII               | M5/114.15.2                                   | BV421, BV711          | BioLegend            | 1:400           |
| CD206               | C068C2                                        | BV650,<br>PE/Dazzle   | BioLegend            | 1:200           |
| CSF1R(CD115)        | AFS98                                         | PerCP-Cy5.5           | BioLegend            | 1:400           |
| CX <sub>3</sub> CR1 | SA011F11                                      | BV785                 | BioLegend            | 1:400           |
| CD45.1              | A20                                           | BV711                 | BioLegend            | 1:400           |
| CD4                 | RM4-5                                         | PE-594                | BioLegend            | 1:400           |
| CD8a                | 53-6.7                                        | BV605                 | BioLegend            | 1:400           |
| CD19                | 6D5                                           | PerCP-Cy5.5,<br>BV421 | BioLegend            | 1:400           |
| CD86                | GL-1                                          | APC-Fire              | BioLegend            | 1:400           |
| CD64                | X54-5/7.1                                     | APC, BV421,<br>FITC   | BioLegend            | 1:200           |
| CD24                | M1/69                                         | BV711                 | BD Pharmingen        | 1:400           |
| CD163               | S15049F                                       | PE                    | BioLegend            | 1:400           |
| Lineage Cocktail    | 145-2C11, RB6-8C5,<br>M1/70, RA3-6B2, Ter-119 | FITC                  | BioLegend            | 1:200           |
| c-Kit               | 2B8                                           | BV421                 | BD Pharmingen        | 1:200           |
| Sca-1               | D7                                            | PE                    | BioLegend            | 1:200           |
| Flt3                | A2F10                                         | APC                   | BioLegend            | 1:200           |
| CD150               | PE-Cy7                                        | TC15-12F12.2          | BioLegend            | 1:200           |
| CD48                | HM48-1                                        | BV605                 | BioLegend            | 1:200           |



**Supplementary Table 2. Mouse immunofluorescence antibodies**

| <b>Antibody</b>  | <b>Clone</b>      | <b>Company</b> | <b>Catalog #</b> | <b>Dilution</b> |
|------------------|-------------------|----------------|------------------|-----------------|
| Iba1             | Rabbit/Polyclonal | Wako Chemicals | 019-19741        | 1:500           |
| Ly6G-PE          | Rat/1A8           | BioLegend      | 127607           | 1:200           |
| CSF1R            | Rabbit/Polyclonal | Invitrogen     | PA5-25974        | 1:500           |
| Ms/Rat WNK1      | Goat/Polyclonal   | R&D Systems    | AF2849           | 1:250           |
| Langerin (CD207) | Mouse/4C7         | Biolegend      | 144203           | 1:500           |

**Supplementary Table 3. Human FACS antibodies**

| <b>Antibody</b> | <b>Clone</b> | <b>Fluorochrome</b> | <b>Company</b> | <b>Dilution</b> |
|-----------------|--------------|---------------------|----------------|-----------------|
| FcR Block       | Not listed   | Unconjugated        | Miltenyi       | 1:20            |
| CD14            | HCD14        | FITC                | BioLegend      | 1:200           |
| CD11B           | ICRF44       | Pe-Cy7              | BioLegend      | 1:400           |
| CD66B           | G10F5        | AF700               | BioLegend      | 1:200           |
| CD86            | IT2.2        | PacBlue             | BioLegend      | 1:200           |
| CD206           | 15-2         | BV711               | BioLegend      | 1:200           |
| CSF1R (CD115)   | 9-4D2-1E4    | PE                  | BD Pharmingen  | 1:400           |
| CD11C           | 3.9          | BV605               | BioLegend      | 1:400           |
| HLA-DR          | L243         | PerCP-Cy5.5         | BioLegend      | 1:200           |

**Supplementary Table 4. Human immunofluorescence antibodies**

| <b>Antibody</b> | <b>Clone</b>      | <b>Company</b> | <b>Catalog #</b> | <b>Dilution</b> |
|-----------------|-------------------|----------------|------------------|-----------------|
| FcR Block       | Not listed        | Miltenyi       | Miltenyi         | 1:50            |
| CSF1R           | Rabbit/Polyclonal | Invitrogen     | PA5-25974        | 1:500           |
| WNK1            | Rabbit/Polyclonal | Invitrogen     | 711356           | 1:250           |

**Supplementary Table 5. Mouse western blot antibodies**

| <b>Antibody</b> | <b>Host/Clone</b> | <b>Company</b> | <b>Catalog #</b> | <b>Dilution</b> |
|-----------------|-------------------|----------------|------------------|-----------------|
| Ms/Rat WNK1     | Goat/Polyclonal   | R&D Systems    | AF2849           | 1:250           |
| IRF8 (ICSBP)    | Mouse/E-9         | Santa Cruz     | sc-365042        | 1:250           |
| $\beta$ -actin  | Mouse/C4          | Santa Cruz     | sc-47778         | 1:20000         |

**Supplementary Table 6. Human western blot antibodies**

| <b>Antibody</b> | <b>Host/Clone</b>  | <b>Company</b> | <b>Catalog #</b> | <b>Dilution</b> |
|-----------------|--------------------|----------------|------------------|-----------------|
| WNK1            | Rabbit/Oligoclonal | Invitrogen     | 711356           | 1:500           |
| OSR1            | Rabbit/Polyclonal  | EMD Millipore  | 07-2264          | 1:500           |
| SPAK            | Rabbit/F7T1K       | Cell Signaling | 2281S            | 1:500           |
| $\beta$ -actin  | Mouse/C4           | Santa Cruz     | sc-47778         | 1:20000         |
